1 **Effects of lowered  $[Na^+]_o$  and membrane depolarization on the  $Ca^{2+}$  transients of**  
2 **fast skeletal muscle fibers. Implications for muscle fatigue.**

3  
4 Marbella Quiñonez and Marino DiFranco.

5  
6 Laboratorio de Fisiología y Biofísica del Músculo.  
7 Instituto de Biología Experimental.  
8 Universidad Central de Venezuela.  
9 Caracas, Venezuela.

10  
11 MQ and MD permanent address:  
12 Department of Physiology.  
13 David Geffen School of Medicine. UCLA.  
14 Los Angeles, CA 90024, USA.

15  
16 Address correspondence to:  
17 Marino DiFranco.  
18 Department of Physiology.  
19 UCLA.  
20 Los Angeles, CA 90095, USA.

21  
22 E-mails:  
23 Marbella Quiñonez: [mquinonez@mednet.ucla.edu](mailto:mquinonez@mednet.ucla.edu)  
24 Marino DiFranco: [mdifranco@mednet.ucla.edu](mailto:mdifranco@mednet.ucla.edu)

25  
26  
27 Short title: Effects of lowered extracellular  $Na^+$  and depolarization on  $Ca^{2+}$  release.  
28

29 **Abstract**

30 Sodium ( $\text{Na}^+$ ) and potassium ( $\text{K}^+$ ) movements during repetitive stimulation of skeletal muscle  
31 fibers leads to lowered transmembrane  $\text{Na}^+$  and  $\text{K}^+$  gradients. Impaired calcium release resulting  
32 from the predicted reduction of the action potential (AP) overshoot (OS) has been suggested as a  
33 causative factor of muscle fatigue.

34 To test this hypothesis, we used a double grease-gap method and simultaneously recorded  
35 membrane action potentials (MAPs) and  $\text{Ca}^{2+}$  release (as  $\text{Ca}^{2+}$  transients), elicited by single pulses  
36 or short trains of pulses (100 Hz, 100 ms), in rested fibers polarized to membrane potentials ( $V_m$ )  
37 between -100 to -55 mV, and exposed to various extracellular  $\text{Na}^+$  concentrations ( $[\text{Na}^+]_o$ ; 115, 90,  
38 60 and 40 mM).

39 In single stimulation experiments, we found that at physiological  $V_m$  (-100 mV),  $\text{Ca}^{2+}$  release was  
40 mostly immune to  $[\text{Na}^+]_o$  reductions up to 60 mM ( $\sim 1/2$  the physiological value). In contrast, at  
41 40 mM  $\text{Na}^+$ ,  $\text{Ca}^{2+}$  release was reduced by 80%, notwithstanding robust MAPs with large OS ( $\sim 30$   
42 mV) were recruited in this conditions.

43 At  $V_m$  between -100 and -60 mV, a 20% reduction of  $[\text{Na}^+]_o$  (115 to 90 mM) had no major  
44 detrimental effects on  $\text{Ca}^{2+}$  release. Instead, depolarization-dependent potentiation of  $\text{Ca}^{2+}$   
45 transients, with a maximum at -65 mV, was observed at both 115 and 90 mM  $\text{Na}^+$ . Potentiation  
46 was smaller at 90 mM  $\text{Na}^+$ . At both  $[\text{Na}^+]_o$ , maximally potentiated  $\text{Ca}^{2+}$  transients (i.e. at -60 mV)  
47 were recruited by MAPs with reduced OSs.

48 In contrast,  $\text{Ca}^{2+}$  release was significantly depressed and no potentiation was observed at  $V_m$   
49 between -100 to -70 mV when  $[\text{Na}^+]_o$  was reduced 60 mM.

50 At extreme  $\text{Na}^+$  (40 mM),  $\text{Ca}^{2+}$  release recorded at  $V_m$  between -100 and -70 mV was almost  
51 obliterated; nonetheless robust MAPs, with OSs of  $\sim 25$  mV, were recruited.

52 Extreme depolarizations significantly depressed  $\text{Ca}^{2+}$  release at all  $[\text{Na}^+]_o$  tested. The  $V_m$  leading  
53 to  $\text{Ca}^{2+}$  release depression was more negative the lower the  $[\text{Na}^+]_o$  (-55, -60 and -70 for 115, 90  
54 and mM  $\text{Na}^+$ , respectively).

55 Fiber exposed to 115-60 mM  $\text{Na}^+$  can sustain normal  $\text{Ca}^{2+}$  release at a frequency of 100 Hz when  
56 polarized between -100 and -80 mV. Depolarizations beyond -80 mV lead to impaired  $\text{Ca}^{2+}$  release  
57 along the trains. In most cases, there was no correlation between changes in  $\text{Ca}^{2+}$  release and  
58 changes in OS. At 40 mM  $\text{Na}^+$ , only the 1st-3rd stimuli of trains recruited  $\text{Ca}^{2+}$  transients, which  
59 were significantly depressed vis a vis close to normal MAPs.

60 Neither the OS nor the duration of MAPs are figures of merit predicting the amplitude of  $\text{Ca}^{2+}$   
61 transients. At critical combinations of depolarization,  $[\text{Na}^+]_o$ , and stimulation frequency,  
62 potentiated  $\text{Ca}^{2+}$  transients are recruited by MAPs with small OSs; and conversely, partial or total  
63 decoupling of  $\text{Ca}^{2+}$  release from close to normal MAPs was observed.

64 Depolarization and  $\text{Na}^+$  deprivation depressed  $\text{Ca}^{2+}$  release in a synergistic way; lowered  $[\text{Na}^+]_o$   
65 increased the detrimental effects of depolarization on  $\text{Ca}^{2+}$  release, and depolarization render the  
66 ECC process more sensitivity to  $\text{Na}^+$  deprivation.

67 Impaired TTS AP generation and/or conduction may explain the detrimental effects of  
68 depolarization and  $\text{Na}^+$  deprivation on  $\text{Ca}^{2+}$  release.

69 The effects of increased  $\text{K}^+$  and  $\text{Na}^+$  deprivation on the force generation of rested fibers can be  
70 explained on the basis of the effects of membrane depolarization and  $\text{Na}^+$  deprivation on  $\text{Ca}^{2+}$   
71 release.

72

73

74

75

76 **Keywords:** muscle fatigue, extracellular sodium concentration, sodium depletion, sodium  
77 deprivation, membrane potential, excitation-contraction coupling, calcium release, high  
78 frequency stimulation, transverse tubular system.

79

80 **Definitions:**

81  $[\text{ion}]_i$ ,  $[\text{ion}]_o$ : intracellular and extracellular ion concentrations; ion=  $\text{Na}^+$ ,  $\text{K}^+$ ,  $\text{Ca}^{+2}$ . (in molar  
82 units)

83 EFM-Na, EMF-K: electromotive force of  $\text{Na}^+$  and  $\text{K}^+$  (in mV)

84  $E_{\text{Na}}$ ,  $E_{\text{K}}$ : equilibrium potential for  $\text{Na}^+$  and  $\text{K}^+$  (in mV)

85  $V_m$ : membrane or holding potential (in mV)

86 TTS: transverse tubular system.

87 Ca-FWHM,  $\text{Ca}^{+2}$  transient full-width at half-maximum (in ms)

88 MAP-FWHM: MAP full-width at half-maximum (in ms)

89 REF: releasing effective time, time a MAP waveform is above -40 mV (in ms)

90

## 91 Introduction

92 Repetitive stimulation of skeletal muscle fibers leads to a gradual decline of their capacity to  
93 generate mechanical work, a phenomenon referred to as muscle fatigue [1], for a review, see [2].

94 Although the exact mechanisms underlying muscle fatigue are still debated, membrane  
95 depolarization, and changes in the extra- and intracellular  $K^+$  and  $Na^+$  concentrations ( $[K^+]_o$ ,  
96  $[Na^+]_o$ ,  $[K^+]_i$ ,  $[Na^+]_i$ ) resulting from repetitive stimulation has been long suggested as possible  
97 causatives factors [2, 3].

98 Impaired generation, waveform, or conduction of Na-dependent action potentials (APs), the  
99 physiological trigger of the excitation-contraction coupling (ECC) process, have been invoked as  
100 mechanisms by which depolarization and changes in  $[K^+]_o$  and  $[Na^+]_o$  leads to fatigue.

101 The effects of increases in  $K^+_o$  and reductions in  $K^+_i$  on force generation have been proposed to be  
102 mediated by membrane depolarization ensuing from the resulting reduction in  $K^+$  electromotive  
103 force (**K-EMF**); which in turn will reduce the sodium conductance (**gNa**) and thus impair the  
104 generation and conduction of APs. The consequent depression of the ECC process would reduce  
105 the capacity to generate force [4, 5]. This explanation for the activity dependent impairment of  
106 force generation is usually referred to as the “potassium hypothesis” of muscle fatigue [4].

107 The detrimental effects of  $Na^+_o$  deprivation and  $Na^+_i$  accumulation on force generation are  
108 explained by a reduction in the  $Na^+$  electromotive force (**Na-EMF**) leading to a reduced AP  
109 overshoot (**OS**) and impaired AP conduction. This alterations will depress  $Ca^{2+}$  release and  
110 subsequent force generation. This explanation is referred to as the “sodium hypothesis” of muscle  
111 fatigue [6].

112 A practical experimental paradigm to assess the role of changes in  $[K^+]_o$  or  $[Na^+]_o$  on muscle  
113 fatigue generation has consisted in measuring the mechanical output of rested muscles or bundles  
114 of muscle fibers in response to field stimulation while the concentration of one ion is changed and  
115 the other is maintained constant [4, 6, 7]. It is assumed that factors contributing to fatigue  
116 development during repetitive stimulation, should also affect force development in rested fibers  
117 [4]. This experimental paradigm does not allow for amenable measurements of membrane  
118 potential, let alone its control. While this approach has been key to further our understanding of  
119 muscle fatigue, the number of studies assessing changes in intermediate steps of the ECC process  
120 (i.e.  $Ca^{2+}$  release) is scant.

121 We have extended this approach by using cut segments of single fibers under current clamp  
122 conditions and directly measuring  $Ca^{2+}$  release with an impermeant low affinity  $Ca^{2+}$ -sensing dye.  
123 In these conditions, membrane potential and extracellular and myoplasmic ionic composition can  
124 be measured and/or controlled [7].

125 Using this method we previously tested directly some of the tenets of the potassium hypothesis  
126 [4]. In particular, we have demonstrated that a)changes in  $Ca^{2+}$  release in response to increased  
127  $[K^+]_o$  up to, but not beyond, 10 mM are mediated by membrane depolarization and raised resting  
128 intracellular calcium concentration ( $[Ca^{2+}]_i$ ); b)the effects of  $[K^+]_o$  changes on  $Ca^{2+}$  release can  
129 be mimicked or counteracted by membrane potential changes imposed by current injection; and,  
130 c)depolarization-dependent (and  $[K^+]_o$ -dependent) changes in action potential overshoot and  
131 duration cannot individually explain the changes in  $Ca^{2+}$  release in response to membrane  
132 depolarization. It was concluded that the effects of elevated  $K^+_o$  (and thus, depolarization) on the  
133 twitch force of rested muscles are mediated by its effects on  $Ca^{2+}$  release and that the concomitant  
134 changes in the AP waveform (i.e. OS, duration) do not directly correlate with changes in  $Ca^{2+}$   
135 release [7].

136 The goal of the present work was to test the  $Na^+$  hypothesis for muscle fatigue. To this end, we  
137 studied the effects of  $Na^+_o$  deprivation on the  $Ca^{2+}$  release of muscle fibers maintained at various  
138 membrane potentials and stimulated with single pulses or brief trains of pulses.

## 139 **Methods**

### 140 **Animal model**

141 Animals were handled in accordance to the regulations laid down by Universidad Central de  
142 Venezuela. Animals were euthanized by rapid transection of the cervical spinal cord followed by  
143 pithing in the cranial and caudal directions. Experiments were performed with segments of fibers  
144 dissected from the dorsal head of the semitendinosus muscle of tropical toads (*Leptodactylus* sp.).

### 145 **Electrophysiological techniques**

146 Segments of fibers, cut at both ends, were mounted in an inverted double grease-seal chamber  
147 originally designed in our laboratory [7, 8] and maintained in current clamp conditions as  
148 previously described. The grease seals delimit three electrically isolated sections. The electrical  
149 activity and  $\text{Ca}^{2+}$  release are measured in the central section. The two lateral sections afford  
150 diffusional access to- and electrical contact with the myoplasm at the central section. The current-  
151 and voltage-clamp amplifier was home made. Experiments were started 20 min after fibers were  
152 mounted in the experimental chamber. Contraction was prevented by stretching the fibers to  
153 sarcomere lengths of about  $4\mu\text{m}$ . This condition also allowed for the  $\text{Ca}^{2+}$  dye calibration at the  
154 end of experiments [7].

155 The mean diameter and sarcomere length were  $62.8 \pm 8 \mu\text{m}$  and  $4.2 \pm 0.5 \mu\text{m}$ , respectively (36  
156 fibers, 9 toads).

157 The membrane potential (or holding potential,  $V_m$ ) was initially adjusted to  $-100 \text{ mV}$ , and then  
158 varied to values between  $-100$  to  $-55 \text{ mV}$  by manually adjusting the holding current.

159 Action potentials were elicited by single pulses or short trains of pulses (100 Hz, 10 pulses). Pulse  
160 duration was  $0.2 \text{ ms}$ , and amplitude was adjusted to  $\sim 15\%$  above the threshold (determined from  
161  $-100 \text{ mV}$ ), and not varied thereafter. Since regenerative responses are recruited simultaneously at  
162 all points of the segment of fiber in the central pool of the experimental chamber [7], non-  
163 propagated or membrane action potentials (MAPs) are elicited.

164 The fibers were continuously perfused with the desired solution. A 3 min period was allowed after  
165 varying the holding potential, and a 3 min period was allowed for equilibration after changing  
166 solutions. When repetitive stimulation was used, 2 min were allowed between consecutive trains.  
167 The use of large equilibration aim at imposing a desired  $[\text{Na}^+]$  in the lumen of the t-tubules  
168 without radial gradients.

169 We measured the overshoot (OS) and duration of MAPs recorded at the different conditions used.  
170 The OS is, by definition, the difference between the peak of a MAP and  $0 \text{ mV}$ . The duration of  
171 MAP waveforms was measured as a) the full-width at half-maximum (**FWHM**) and b) the full-  
172 width at  $-40 \text{ mV}$ . The later represents the time the membrane potential is above  $-40 \text{ mV}$ , a typical  
173 value for the  $\text{Ca}^{2+}$  release threshold in voltage clamp conditions [9, 10]. This parameter represents,  
174 in practice, the time during which  $\text{Ca}^{2+}$  release can occur, i.e. the releasing effective time (**REF**).  
175 REF definition stems from the classical mechanically effective time [11, 12].

176 All experiments were performed at room temperature ( $21\text{-}22^\circ\text{C}$ ).

### 177 **Solutions**

178 The central section of the fibers were bathed in Ringer solution (in mM: 115 NaCl, 2.5 KCl, 1.8  
179  $\text{CaCl}_2$ , 1  $\text{MgCl}_2$  and 10 4-morpholineethanesulfonic acid [MOPS]; titrated with NaOH) while both  
180 cut ends of the fibers were bathed in an “internal” solution designed to approximate the myoplasm  
181 ionic composition (in mM: 110 aspartate, 5  $\text{K}_2\text{-ATP}$ , 5  $\text{Na}_2\text{-creatine phosphate}$ , 20 MOPS, 0.1  
182 ethylene glycol tetraacetic acid [EGTA], 5  $\text{MgCl}_2$ , titrated with KOH and added with 0.5 mg/ml  
183 creatine phosphokinase) [7]. Reductions in  $[\text{Na}^+]_o$  were compensated by additions of N-methyl-  
184 D-glucamine, thus osmolarity was maintained constant.  $[\text{Na}^+]_o$  was changed from 115 mM to 90,  
185 60 and 40 mM.  $[\text{K}^+]_o$  was maintained constant in all experiments (i.e. 2.5 mM). All solutions, had  
186 a  $\text{pH}=7.2$  and an osmolarity of  $250 \pm 3 \text{ mOsmol/kg H}_2\text{O}$ . Assuming an intracellular  $\text{Na}^+$  activity  
187 of 10 mM (i.e. identical to that of the internal solution [7]), a temperature of  $20^\circ\text{C}$  ( $295^\circ\text{K}$ ), and  
188

190 ideal selectivity of the sodium channels, the equilibrium potential for Na<sup>+</sup> (**ENa**) in the presence  
191 of 115, 90, 60 and 40 mM extracellular Na<sup>+</sup> was calculated as 62, 56, 47 and 35 mV, respectively.  
192 All chemicals were from Sigma.

### 193 194 **Calcium measurement**

195 Changes in [Ca<sup>2+</sup>]<sub>i</sub> elicited by MAPs (thereafter referred as Ca<sup>2+</sup> transients) were followed with a  
196 low affinity impermeant fluorescent calcium dye (Oregon green 488 BAPTA 5N, thereafter,  
197 OGB5N; ThermoFisher Scientific). Ca<sup>2+</sup> dependent fluorescence transients were measured using  
198 the setup previously described [7]. [Ca<sup>2+</sup>]<sub>i</sub> changes (i.e. in actual μM units) were calculated using  
199 the same parameters and methods described previously [7]. The peak (μM) and duration of Ca<sup>2+</sup>  
200 transients recorded at different conditions were measured. Duration was evaluated as the full-  
201 width at half-maximum (**FWHM**), and referred to as **Ca-FWHM** thereafter.

### 202 203 **Data acquisition and analysis**

204 Membrane potential and fluorescence signals were filtered at 5 and 2 kHz, respectively, using 8-  
205 pole Bessel filters (Frequency Devices); and acquired simultaneously using a Digidata 1200A  
206 acquisition system and Axotape software (Molecular Devices). Data were analyzed using Origin  
207 8.0 (Origin Microcal). Data are presented as means ± SE. Means were compared using the  
208 Student's t-test. Statistical significance was set at p<0.05.



## 209 **Results**

### 210 **Effects of reducing $[\text{Na}^+]_o$ on $\text{Ca}^{2+}$ transients recorded from fibers maintained at -** 211 **100mV**

212 We first studied the  $\text{Ca}^{2+}$  transients and MAPs elicited by single pulse stimulation in fibers  
213 maintained at a holding potential of -100 mV and chronically exposed to 115, 90, 60 and 40 mM  
214  $\text{Na}^+_o$  (Figure 1). In this way, the effects of changes in  $[\text{Na}^+]_o$  on MAP generation and  $\text{Ca}^{2+}$  release  
215 can be studied at constant  $V_m$  and  $g_{\text{Na}}$ . Also, at this potential the availability of  $\text{Na}^+$  channels and  
216 the voltage sensor for ECC is maximized.

217 A substantial 25 mM reduction of  $[\text{Na}^+]_o$  from 115 to 90 mM results only in a slight reduction in  
218 the raising phase and a slight increase in the time to peak of  $\text{Ca}^{2+}$  transients (Figure 1A and inset,  
219 black and blue traces, respectively). Likewise, the simultaneously recorded MAPs eliciting those  
220  $\text{Ca}^{2+}$  transients are very similar to each other (Figure 1B and inset, black and blue traces).

221 A further reduction of  $[\text{Na}^+]_o$  to 60 mM (e.g. a 55 mM change) leads per se to a slightly smaller  
222  $\text{Ca}^{2+}$  transient, with a delayed onset and a the longer time to peak as compared with records  
223 obtained at physiological  $[\text{Na}^+]_o$  (Figure 1A and inset, red trace). These changes are accompanied  
224 by a small reduction in the MAP OS (Figure 1B). Changes induced by reducing  $\text{Na}^+_o$  were fully  
225 reversed by returning to Ringer solution containing 115 mM  $\text{Na}^+$  (Figures 1A and 1B and insets,  
226 green traces). Reversibility was demonstrated for all other conditions used in this work (not  
227 shown).

228 The most dramatic effects are seen upon reducing  $[\text{Na}^+]_o$  to 40 mM (close to 1/3 of the  
229 physiological value). As shown in Figure 1C and inset (magenta trace), the amplitude of the  $\text{Ca}^{2+}$   
230 transient was reduced by about 80% in the presence of 40 mM  $[\text{Na}^+]_o$ , and the time to peak  
231 significantly increased. Notably, the changes in the corresponding MAP are relatively minor as  
232 compared with the gross impairment of the  $\text{Ca}^+$  transient. Although the MAP OS was reduced from  
233 51 to 30 mV (Figure 1D and inset, cyan trace), this change seems in itself insufficient to explain  
234 the almost obliteration of the  $\text{Ca}^{2+}$  release (Figure 1D and inset, cyan trace). Since  $V_m$  was kept  
235 constant,  $g_{\text{Na}}$  should have also remained constant; consequently, variations in the OS were small;  
236 as expected from the calculated  $\text{ENa}$ .

237 In contrast to what was observed in response to changes in  $[\text{K}^+]_o$  [7], no significant changes in  
238 pre-stimulus  $[\text{Ca}^+]_i$  were detected in response to reductions of  $[\text{Na}^+]_o$  alone.

### 239 **Effects of membrane depolarization on $\text{Ca}^{2+}$ transients recorded from fibers** 241 **exposed to various $[\text{Na}^+]_o$**

242 The previous section demonstrated that, in fibers maintained at -100 mV and exposed to 2.5 mM  
243  $\text{K}^+_o$ , the  $\text{Ca}^{2+}$  release is practically immune to  $[\text{Na}^+]_o$  reductions down to 60 mM. We have  
244 previously demonstrated that the effects of K-dependent depolarization on  $\text{Ca}^{2+}$  release can be  
245 mimicked by current injection [7]. In order to assess the combined effects of changes in resting  
246 membrane potential and  $[\text{Na}^+]_o$  on the ECC process, we next recorded  $\text{Ca}^{2+}$  transients and MAPs  
247 elicited by single stimulation in fibers exposed to various  $[\text{Na}^+]_o$  (115, 90, 60 and 40 mM) and  
248 maintained at potentials between -100 and -55 mV (typically, -100, -90, -80, -70, -65, -60 and -  
249 55 mV) by steady current injection while  $[\text{K}^+]_o$  was maintained constant. Representative records  
250 obtained at each condition are shown in Figure 2.

251 As previously reported [7], in the presence of 115 mM  $\text{Na}^+_o$ , imposed steady membrane  
252 depolarizations has a dual effect on  $\text{Ca}^{2+}$  release.  $\text{Ca}^{2+}$  transients are potentiated for  
253 depolarizations between -100 and -60 mV (Figure 2A and inset, black, blue and red traces), but  
254 their amplitude is sharply reduced for further depolarizations to -55 mV (Figure 2A and inset,  
255 green trace). Fiber depolarization led to an increase in resting  $[\text{Ca}^{2+}]_i$ , as previously shown [7].

256 MAPs eliciting the  $\text{Ca}^{2+}$  transients in Figure 2A are shown in Figure 2B. MAPs recorded at -100  
257 and -80 mV differ only in the imposed  $V_m$  (Figure 2B and inset, black and blue traces). Instead,  
258 significant reductions in the OS are seen for depolarizations to -60 and -55 mV. Notably, a mere  
259 5 mV depolarization leads from the more potentiated  $\text{Ca}^{2+}$  transient (at -60 mV, Figure 2B and

260 inset, red trace) to the more depressed one (Figure 2B and inset, green trace). These changes may  
261 probably results from voltage dependent reduction of  $g_{Na}$ .  
262 Similar responses were obtained for fibers exposed to 90 mM  $Na^+$  (Figure 2C and 2D). The  
263 extreme sensitivity of  $Ca^{2+}$  release to membrane potential is exemplified by records obtained at -  
264 57 mV (Figure 2C and 2D, green traces). Both the values of peak  $Ca^{2+}$  release and the OS are larger  
265 than those obtained at -55 mV in the presence of 115 mM  $Na^+$ .  
266  $Ca^{2+}$  release is well maintained in the presence of 60 mM  $Na^+$  over a range of membrane  
267 potentials spanning from -100 to -70 mV. Nonetheless, in these conditions, aside from a reduced  
268 amplitude of the  $Ca^{2+}$  transients, interesting changes in the ECC are observed. The depolarization-  
269 dependent potentiation of  $Ca^{2+}$  release seen in fibers exposed to 115 and 90 mM  $Na^+$  is absent in  
270 the presence of 60 mM  $Na^+$ , i.e.  $Ca^{2+}$  release is essentially identical at membrane potentials  
271 between -100 and -70 mV (Figure 2E and inset, black, blue and red traces). In addition,  
272 depolarization-dependent depression of ECC is shifted leftward, as a significant reduction in peak  
273  $Ca^{2+}$  release is seen at -65 mV (Figure 1E and inset, green trace), a membrane potential that elicits  
274 potentiation in fibers bathed in 115 and 90 mM  $Na^+$ . In these last conditions, the AP essentially  
275 lacks an OS (Figure 2F and inset, green trace). These results clearly show that sensitivity to  
276 depolarizations is increased at reduced  $[Na^+]_o$ .  
277  $Ca^{2+}$  release was almost abolished at all membrane potentials tested when fibers are equilibrated  
278 in 40 mM  $Na^+$  (Figure 2G and 2H). Interestingly, while  $Ca^{2+}$  release is barely distinguishable from  
279 baseline in fibers polarized to either -100 or -70 mV (Figure 2G and inset, black and green traces),  
280 sizable  $Ca^{2+}$  transients are detected at -90 and -80 mV (Figure 2G and inset, blue and red traces).  
281 Figure 2H shows that MAPs elicited from -100 and -70 mV display a large OS (about 25 mV) still  
282 failed to recruit sizable  $Ca^{2+}$  release (black and green traces). Also, MAP elicited from -90 and -80  
283 mV have a similar OS and yet the  $Ca^{2+}$  release at -80 mV is larger than that at -90 mV (Figure 2H  
284 and inset, blue and red traces). These data show that at very low values,  $[Na^+]_o$  has dominant  
285 depressing effects on the ECC process, suggesting a decoupling between mostly normal MAPS and  
286  $Ca^{2+}$  release.

### 287 288 **Voltage dependence of $Ca^{2+}$ release in fibers exposed to various $[Na^+]_o$ .**

289 Experiments similar to those in Figure 2 were conducted in a population of fibers (see Figure 3)  
290 to assess how combined changes in  $[Na^+]_o$  and membrane potential affect  $Ca^{2+}$  release. To get  
291 insight on the dependence of  $Ca^{2+}$  release on resting potential alone we first plotted the peak of  
292  $Ca^{2+}$  transients recorded at each  $[Na^+]_o$  as a function of  $V_m$  (Figure 3A).

293 The first significant finding is the resilience of  $Ca^{2+}$  release to large depolarizations even in face of  
294  $[Na^+]_o$  reductions down to 60 mM (Figure 3A, black, red and blue traces). In fact, fiber  
295 depolarizations from -100 mV similarly potentiate  $Ca^{2+}$  release for both 115 and 90 mM  $Na^+$ , with  
296 a maximum effect at -65 mV (Figure 3A, black and red traces). Potentiation is not seen in fibers  
297 bathed in 60 mM  $[Na^+]_o$ ; instead a relatively small, almost voltage-independent reduction in the  
298 peak of  $Ca^{2+}$  transients was observed for depolarizations up to -70 mV, as compared with those  
299 recorded at 115 mM  $Na^+$  (Figure 1A, black and blue traces).

300 The second finding is that  $Ca^{2+}$  release is significantly reduced when fibers are depolarized beyond  
301 -70 or -60 mV, depending on the  $[Na^+]_o$ . At high  $[Na^+]_o$  (i.e. 115 and 90 mM, black and red traces,  
302 Figure 3A),  $Ca^{2+}$  release is reduced to a large extent only for very large depolarizations to -55mV,  
303 while a large depression is seen for smaller depolarizations (i.e. beyond -70 mV, blue trace, Figure  
304 3A) when fibers are bathed in 60 mM  $Na^+$ . Clearly,  $Ca^{2+}$  release is more sensitive to depolarization  
305 at lower  $[Na^+]_o$ .

306 A rather intriguing voltage-dependence of  $Ca^{2+}$  release is seen at extremely low  $[Na^+]_o$ . At 40 mM  
307  $Na^+$ ,  $Ca^{2+}$  release is largely reduced at all membrane potentials tested, with an apparent minimum  
308 reduction at -80 mV.

309 To better appreciate the dependence of  $Ca^{2+}$  release on  $[Na^+]_o$ , we plotted the peak of  $Ca^{2+}$   
310 transients shown in Figure 3A as a function of  $[Na^+]_o$  (Figure 3B).



311 This representation clearly shows that  $\text{Ca}^{2+}$  release elicited by single stimulation is very insensitive  
312 to reductions of  $[\text{Na}^+]_o$  to about half the physiological concentration (i.e. 115 to 60 mM) as long as  
313 membrane potential is maintained between -100 and -70 mV (Figure 3B, black, blue, red and  
314 green traces). Nonetheless, for this membrane potential range,  $\text{Ca}^{2+}$  release is largely reduced if  
315  $[\text{Na}^+]_o$  is further decreased to 40 mM (Figure 3B, black, blue, red and green traces).

316 The sensitivity of  $\text{Ca}^{2+}$  release to reductions in  $[\text{Na}^+]_o$  highly increases when fibers are further  
317 depolarized beyond -70 mV. At resting potentials of -65 to -60 mV, reducing  $[\text{Na}^+]_o$  below 90 mM  
318 results in reduced  $\text{Ca}^{2+}$  release (Figure 3B, cyan and magenta traces), while at -55 mV further  
319 impairing of  $\text{Ca}^{2+}$  release is seen at 90 mM  $\text{Na}^+_o$  (Figure 3B, orange trace). This data show that the  
320 larger the depolarization, the larger the effects of  $\text{Na}^+_o$  deprivation.

321 For the same population of fibers, we also looked at the effects of depolarization and  $[\text{Na}^+]_o$   
322 deprivation on the duration (FWHM) of  $\text{Ca}^{2+}$  transients (thereafter, **Ca-FWHM**; Figures 3C and  
323 3D).

324 In the range of membrane potentials between -100 and -70 mV, the duration of  $\text{Ca}^{2+}$  transients  
325 recorded from fibers bathed in 115 and 90 mM  $\text{Na}^+_o$  were similar to each other (~4.5 ms) and  
326 almost insensitive to depolarization (Figure 3C, black and red traces). For further depolarizations  
327 to -55 mV, the FWHM of  $\text{Ca}^{2+}$  transients at 115 and 90 mM  $\text{Na}^+_o$  increased significantly to about  
328 7.7 and 9.5 ms, respectively (Figure 3C, black and red traces).

329 The Ca-FWHM recorded at 60 mM  $\text{Na}^+_o$  were larger than those at 115 mM  $\text{Na}^+_o$  at all membrane  
330 potentials in the range of -100 to -65 mV. In these conditions, the Ca-FWHM was mildly sensitive  
331 to depolarization (Figure 3C, blue trace).

332 The  $\text{Ca}^{2+}$  transients of fibers bathed in 40 mM  $\text{Na}^+_o$  are significantly prolonged (~7 ms) as  
333 compared with those recorded at 115 mM  $\text{Na}^+_o$ , and mostly insensitive to membrane  
334 depolarization between -100 and -70 mV (Figure 3B, green trace).

335 The dependence of Ca-FWHM on  $\text{Na}^+_o$  is shown in Figure 3D. Reducing  $\text{Na}^+_o$  from 115 to 90 mM  
336 had no significant effects on  $\text{Ca}^{2+}$  transients recorded in fibers polarized between -100 and -65  
337 mV (Figure 3D, black, blue, red, green and cyan traces). For those same potentials, the  $\text{Ca}^{2+}$   
338 transients were prolonged when  $[\text{Na}^+]_o$  was further reduced to 40 mM. At 115 and 90 mM  $\text{Na}^+_o$ ,  
339 highly depolarized fibers (-60 and -55 mV) showed the longest  $\text{Ca}^{2+}$  transients (Figure 3D,  
340 magenta and orange traces).

### 341 342 **Effects of membrane depolarization and reduction of $[\text{Na}^+]_o$ on the overshoot and** 343 **FWHM of MAPs**

344 In physiological conditions the ECC process is triggered by a longitudinally and radially  
345 propagated AP. It can be expected that either the amplitude or the width of the AP, or both  
346 parameters, may be determinant factors of the features of  $\text{Ca}^{2+}$  transients, or hence those of the  
347 twitch force. In contrast to physiological conditions, in our case, MAPs are the trigger of the ECC  
348 progress.

349 We first determined the dependence of the OS on membrane potential and  $[\text{Na}^+]_o$ . MAPs elicited  
350 by single stimulation in rested fibers polarized at -100 mV and exposed to 115 mM  $\text{Na}^+_o$  have a  
351 mean OS close to 50 mV (the predicted  $E_{\text{Na}}$  is 62 mV). Fiber depolarization and  $\text{Na}^+_o$  deprivation  
352 are expected reduce the OS by different mechanisms. To study the extent of these effects, we  
353 plotted the OS as a function of the resting potential (Figure 4A) or  $[\text{Na}^+]_o$  (Figure 4B).

354 Each plot in Figure 4A represents data obtained at a particular  $\text{Na}^+_o$ . For 115 and 90 mM  $[\text{Na}^+]_o$ ,  
355 the OS was mostly insensitive to depolarizations along a 30 mV range from -100 to -70 mV, but  
356 drop abruptly to values close to zero when fibers are further depolarized to -55 mV, i.e. an  
357 additional 15 mV change (Figure 4A, black and red traces and symbols). Notably, in the range of  
358 potentials leading to  $\text{Ca}^{2+}$  release potentiation, the OS was either constant or decreased (compare  
359 Figures 3A and 4A). A similar voltage dependence was seen for 60 and 40 mM  $\text{Na}^+_o$ , but the  
360 transition point from voltage-independent to voltage-dependent OS values seems to be -80 mV,  
361 instead of -70 mV, as seen at larger  $[\text{Na}^+]_o$  (Figure 4A, blue and green traces and symbols).

362 Comparisons among the four plots in Figure 4A show that for any given membrane potential the  
363 lower the  $[Na^+]_o$ , the smaller the OS. The dependence of the OS on  $[Na^+]_o$  is better demonstrated  
364 in Figure 4B; in this case, each plot represents data obtained at the same holding potential. For  
365 all membrane potentials explored, the OS decreases as the  $Na^+$  is lowered from 115 to 40 mM.  
366 The dependence is close to linear if  $[Na^+]_o$  is represented in a logarithmic scale (not shown).  
367 Noticeable, lowering  $[Na^+]_o$  produced similar reductions on the OS at membrane potentials -100  
368 and -80 mV, as demonstrated by the close overlapping of the black, blue and red traces in Figure  
369 4B. However, the same changes in  $[Na^+]_o$  produced much larger reductions in the OS for larger  
370 depolarizations to 60 mV (Figure 4B, cyan and magenta lines and symbols). At extreme  
371 depolarizations (i.e. -55 mV) the OS is little affected upon reducing  $[Na^+]_o$  from 115 to 90 mM  
372 (Figure 4B, orange line and symbols).

373 We next measured the FWHM of MAPs (thereafter, **MAP-FWHM**) recorded from the same  
374 population of fibers (Figure 5A). It can be seen that for the four  $[Na^+]_o$  tested, the MAP-FWHM  
375 decreases monotonically as fibers are depolarized from -100 to -70 mV. In addition, for 115 and  
376 90 mM  $Na^+$ , further depolarization towards -55 mV resulted in a significant prolongation of  
377 MAPs. Moreover, for any given  $V_m$  between -100 and 70 mV, significantly wider MAPs are  
378 recorded at 90 and 60  $Na^+$  as compared with those at 115  $Na^+$ . Overall, for 115 to 60 mM  $Na^+$ ,  
379 voltage-dependence of changes in MAP-FWHM (Figure 5A) and  $Ca^{2+}$  release (Figure 3A) do not  
380 correlate.

381 We reasoned that this may be due to the fact that MAP-FWHM is measured at potentials more  
382 positive than the threshold for  $Ca^{2+}$  release in voltage clamp conditions, typically about -40 mV  
383 [9, 10]. Looking for a parameter that better correlates with the peak  $Ca^{2+}$  transients, we measured  
384 the RET of MAPs (thereafter, **MAP-RET**; Figure 5B, see also Methods for definition).

385 As expected, MAP-RET was larger than MAP-FWHM at all equivalent combinations of membrane  
386 potentials and  $[Na^+]_o$ . In contrast to MAP-FWHM, MAP-RET for all  $[Na^+]_o$  is mostly independent  
387 of membrane depolarization in the range of -100 to -70 mV. For 90 and 60 mM  $Na^+$ , significantly  
388 larger MAP-RETs were measured from MAPs recorded at all membrane potential tested as  
389 compared with those measured at 115 mM  $Na^+$ . Thus, at least in the range of membrane  
390 potentials between -10 and -70 mV, MAP-RET better correlates with  $Ca^{2+}$  release than MAP-  
391 FWHM. At potentials positive to -70 mV both parameters negatively correlate with  $Ca^{2+}$  release.

### 392 393 **Effects of low $[Na^+]_o$ and depolarization on $Ca^{2+}$ release elicited by repetitive** 394 **stimulation**

395 It is well established that tetanic force is more sensitive to  $[Na^+]_o$  deprivation and depolarization  
396 than twitch tension [11], but similar studies of  $Ca^{2+}$  release are missing. Thus, we measured  $Ca^{2+}$   
397 transients elicited by short (100ms) 100 Hz trains in rested fibers exposed to 40-125 mM  $Na^+$   
398 and maintained at holding potentials between -100 and -55 mV. Experiments in each  $[Na^+]_o$  were  
399 repeated in 3-4 different fibers.

400 **115 mM  $Na^+$ .** In physiological conditions (i.e. 115 mM  $Na^+$  and -100 mV), when fibers were  
401 stimulated with short trains of pulses (100 ms) applied at 100 Hz, a distinct  $Ca^{2+}$  transient was  
402 recruited by each of 10 stimulus applied, i.e. fidelity equals 1 (Figure 5A, top panel). Nonetheless,  
403 regardless all the corresponding MAPs have an identical OS (~50 mV, Figure 5A, bottom panel),  
404 the peak of the first  $Ca^{2+}$  transient is not maintained along the trains. Instead, the peak of the  $Ca^{2+}$   
405 transients decays from the first response, exceeding 5  $\mu M$ , to a smaller, relatively stable value by  
406 the 4<sup>th</sup> response, which is typically about 50% that of the first response. The interpulse  $[Ca^{2+}]_i$  also  
407 remains elevated, at about 1.5  $\mu M$ , along the trains as compared with the pre-stimulus value  
408 (Figure 4A, top panel). In contrast to the constancy of the OS, the interpulse membrane potential  
409 becomes progressively more positive along the train, reaching a relatively stable value by the end  
410 of stimulation.

411 Aside from the potentiation of the first  $Ca^{2+}$  transient (as seen in single stimulation experiments),  
412 at 115  $Na^+$ , depolarization to -80 mV does not have significant effects on the  $Ca^{2+}$  release along

413 the train (Figure 5B, top panel). The electrical responses at -80 mV are also comparable to those  
414 elicited at -100 mV (Figure 5B, bottom panel).

415 Depolarization to -60 mV also results in a predictable potentiation of the first Ca<sup>+2</sup> transient, but  
416 an unexpected significant depression of the Ca<sup>+2</sup> release was seen afterwards. While fidelity was  
417 no reduced, the Ca<sup>+2</sup> transient's peaks decay in an irregular fashion along the train, sometimes  
418 resembling alternants (Figure 5C, top panel). Interestingly, regardless the corresponding first  
419 MAP at -60 mV is reduced as compared to those at -100 and -80 mV, it still recruited a potentiated  
420 Ca<sup>+2</sup> transient. While the rest of MAPs are smaller, they show similar features among them (Figure  
421 5C, bottom panel); this do not correlates with the irregular changes observed in Ca<sup>+2</sup> release peaks  
422 (Figure 5C, bottom panel).

423 Concurring with data from single stimulation, Ca<sup>+2</sup> release is almost abolished at -55 mV (Figure  
424 5D, top panel). In contrast, regular MAPs, with similar relatively large OSs of about 5 mV, were  
425 elicited by each pulse along the train (Figure 5D, bottom panel). Only a small Ca<sup>+2</sup> transient was  
426 elicited by the first MAP, while the rest of MAPs failed to recruit any Ca<sup>+2</sup> release.

427 Similar responses were confirmed in another 4 fibers.

428 **90- mM Na<sup>+o</sup>.** Representative responses of fibers (n=4) bathed in 90 mM Na<sup>+o</sup> to repetitive  
429 stimulation are shown in Figure 5E-5H.

430 The patterns of Ca<sup>+2</sup> release and MAPs recorded at -100 and -80 mV are similar to those recorded  
431 at -115 mM Na<sup>+o</sup> (Figures 5E and 5F; compare with Figures 5A and 5B).

432 In fibers maintained at -60 mV, a slightly potentiated Ca<sup>+2</sup> transient is seen in response to the first  
433 stimulus of the train; however, only every other later MAP recruited a Ca<sup>+2</sup> transient afterwards,  
434 each of them reaching a peak similar to that of the Ca<sup>+2</sup> transients recorded at -100 and -80 mV  
435 (Figure 5G, top panel). This pattern was seen in 2 out of 4 fibers. In contrast, skipping was never  
436 seen for MAP generation (Figure 5G, bottom panel).

437 As seen in 115 mM Na<sup>+o</sup>, when fibers are depolarized to -55 mV, a MAP is elicited by each pulse of  
438 the train. Nevertheless, in this case, MAPs are much smaller than those at 155 mM Na<sup>+o</sup>, peaking  
439 at about -10 mV (Figure 5H, top panel). As for experiments at 115 mM Na<sup>+o</sup>, only the first MAP  
440 triggers a Ca<sup>+2</sup> transient at 40 mM Na<sup>+o</sup> (Figure 5H, bottom panel).

441 **60 mM Na<sup>+o</sup>.** In fibers exposed to 60 mM Na<sup>+o</sup> (n=4), Ca<sup>+2</sup> transients are recruited by each pulse  
442 of the trains as far as the membrane potential is held more negative than -80 mV (Figure 6A and  
443 6B, top panels). The pattern of release along the train is similar to that seen at 115 and 90 mM  
444 Na<sup>+o</sup>, but no potentiation is seen in response to the first pulse at -80 mV. Likewise, in these  
445 conditions, robust MAPs are triggered at both membrane potentials, with OSs about 35 mV  
446 (Figure 6A and 6B, bottom panels).

447 Nevertheless, at 60 mM Na<sup>+o</sup> release along the train is not sustained at potentials as negative as -  
448 70 mV. In this case, the peak of each Ca<sup>+2</sup> transient release decays along the train, and is barely  
449 noticeable as ripples by the 5<sup>th</sup> or 6<sup>th</sup> pulse (Figure 6C, top panel). In contrast, MAPs of preserved  
450 features, and OSs above 20 mV are generated in response of each pulse (Figure 6C, bottom panel).  
451 This results demonstrate that lowering Na<sup>+o</sup> compromise the Ca<sup>+2</sup> release but not the MAP  
452 generation along the trains. This is another example of an apparent disconnection between the  
453 amplitude of the MAPs and the recruitment of Ca<sup>+2</sup> transients.

454 For further depolarizations to -65, small Ca<sup>+2</sup> transients are only recruited in response to the first  
455 two pulses of the train, while robust MAPs are elicited by each stimulus (Figure 6D).

456 **40 mM Na<sup>+o</sup>.** Reducing [Na<sup>+</sup>]<sub>o</sub> to 40 mM almost completely inhibits Ca<sup>+2</sup> release in fibers  
457 polarized between -100 and -70 mV. In most cases, after the second or third pulses, Ca<sup>+2</sup> release  
458 is reduced to small ripples in response to each pulse of the trains (Figures 6E-6H, top panels).  
459 However, small Ca<sup>+2</sup> transients are seen in response to the first pulse of the trains, their peaks had  
460 a similar voltage-dependence as that observed in response to single stimulation. Notably, at all  
461 the potentials explored, robust MAPs, with OSs of 20-30 mV, are elicited by each stimulus along  
462 the train (Figures 6E-6H, bottom panels). A similar depression of Ca<sup>+2</sup> release was observed in  
463 other two fibers. As noticed above for single stimulus experiments, in our working conditions,

464 extreme Na<sup>+</sup>o deprivation decouples Ca<sup>+2</sup> release from surface membrane depolarization (i.e.  
465 AMPs).

## 466 **Discussion**

467 We have previously demonstrated the usefulness of our opto-electrophysiological method based  
468 on the use of inverted grease-gap chambers to study mechanisms of fatigue in segments of fibers  
469 from long muscles, which are not amenable for most electrophysiological techniques [7].

470 This approach allows for simultaneously studying excitability and  $\text{Ca}^{2+}$  homeostasis in rested  
471 fibers mechanically arrested by stretching (sarcomere length  $\sim 4 \mu\text{m}$ ), while controlling the  
472 membrane resting potential and the intra- and extracellular milieu composition.

473 In our experimental conditions, non-propagating APs, i.e. MAPs, and  $\text{Ca}^{2+}$  transients free of  
474 mechanical artifacts can be recorded with minimal perturbations of the fiber's  $\text{Ca}^{2+}$  buffering  
475 capacity. The use of a low affinity  $\text{Ca}^{2+}$  dye and in situ calibrations allow for quantitative fast time  
476 resolution studies of  $\text{Ca}^{2+}$  release [7].

477 Although muscle fatigue is multifactorial in origin, our capacity of studying the role of particular  
478 causative factors in isolation in rested fibers has proven to be mechanistically insightful [7].

479 In this work we assessed some of the tenets of the  $\text{Na}^+$  hypothesis for muscle fatigue. To this end  
480 we performed a study of the effects of steady state reductions in the  $[\text{Na}^+]_o$  and depolarization on  
481 the electrical activity and  $\text{Ca}^{2+}$  release of fast skeletal muscle fibers exposed to (constant)  
482 physiological  $[\text{K}^+]_o$ , and expectedly, at constant  $[\text{Na}^+]_i$  and  $[\text{K}^+]_i$ . Of relevance for data  
483 interpretation, it is expected that pre-stimulus membrane potential and  $[\text{Na}^+]_o$  are the same at the  
484 surface and TTS membranes and that no radial membrane potential or  $[\text{Na}^+]_o$  gradients exist.  
485 Consequently, pre-stimulus availability of  $\text{Na}^+$  channels and Na-EMF is the same at both  
486 membrane compartments.

487 Since most effects of raising  $[\text{K}^+]_o$  on  $\text{Ca}^{2+}$  release are directly mediated by membrane  
488 depolarization [7], the combined effects of simultaneous alterations of  $[\text{K}^+]_o$  and  $[\text{Na}^+]_o$ , typically  
489 used in force-measuring experiments, can be inferred from the interactions of the effects of  $\text{Na}^+$   
490 deprivation and membrane depolarization described here.

491

### 492 **Ca release in highly polarized fibers exposed to lowered $[\text{Na}^+]_o$**

493 The main tenet of the  $\text{Na}^+$  hypothesis for muscle fatigue is that  $\text{Na}^+$ o depletion (and  $\text{Na}^+$   
494 accumulation) will impair TTS AP propagation [11]. To what extent these concentrations should  
495 change to depress AP generation and propagation, and thus  $\text{Ca}^{2+}$  release, is unknown. Our  
496 experimental design may help defining what t-tubular  $[\text{Na}^+]_i$  at constant  $[\text{Na}^+]_i$  and in the absence  
497 of radial  $[\text{Na}^+]_i$  gradients, may compromise the ECC process.

498 While interstitial  $[\text{Na}^+]_i$  changes upon repetitive activation seems to be too small to support the  
499  $\text{Na}^+$  hypothesis [13, 14]; and force in rested muscles is only reduced by very large  $[\text{Na}^+]_o$   
500 deprivation [11], these results do not fully rule out the  $\text{Na}^+$  hypothesis for muscle fatigue. Changes  
501 in  $[\text{Na}^+]_i$  larger than those measured in plasma or interstitium are expected to occur in the TTS,  
502 particularly at high stimulation frequencies [5, 11, 15-17], and the change in  $[\text{Na}^+]_o$  required to  
503 reduce force is smaller at high  $[\text{K}^+]_o$  (i.e. at depolarized potentials) [11, 16, 18]. Moreover,  
504 simultaneous changes in  $[\text{Na}^+]_i$  and  $[\text{K}^+]_i$  will further reduce the Na-EMF and depolarize the fibers  
505 [3], as compared with the changes due only to  $\text{Na}^+$ o deprivation, as used in this work .

506 Although these studies provide insights on the causative relation between  $[\text{Na}^+]_o$  deprivation and  
507 impaired force generation, the possible effects of  $[\text{Na}^+]_o$  reductions on  $\text{Ca}^{2+}$  release has only been  
508 inferred so far.

509 Our single stimulus experiments at high membrane potential (i.e. -100 mV, Figure 1)  
510 demonstrated that  $\text{Ca}^{2+}$  release is practically immune to reductions of  $[\text{Na}^+]_o$  to values as low as  
511 half the physiological concentration, but is significantly impaired when fibers are bathed in 40  
512 mM  $\text{Na}^+$ o (Figure 1C). Our observations explain the effects of lowering  $[\text{Na}^+]_o$  on twitch force of  
513 rested frog muscles as the twitch force- $[\text{Na}^+]_o$  relationship previously reported (Figure 2, [6]) and  
514 the peak  $\text{Ca}^{2+}$  transient- $[\text{Na}^+]_o$  relationship found here (Figure 3B) are very similar to each other.



515 Simultaneously recorded membrane potential shows that the grossly contrasting effects of  
516 extreme  $[Na^+]_o$  deprivation on  $Ca^{2+}$  release does not concur with relatively minor changes in the  
517 OS (Figures 1 and 4).

518 There is then an obvious dissociation between the apparent intactness of MAPs and the  
519 pronounced impairment of the  $Ca^{2+}$  transients they triggered. In other words, at very low  $[Na^+]_o$ ,  
520 the  $Ca^{2+}$  release mechanism seems to decouple from surface membrane APs (as reported by MAP  
521 recordings).

522 Our finding is not new; a similar dissociation, but between mechanical output and action potential  
523 amplitude was observed in frog fibers half a century ago by Bezanilla et al.; who concluded that  
524 “the action potential diminution alone is not sufficient to explain decreased tension” [15].

525 Our experimental paradigm is expected to assure that the surface and TTS membranes are  
526 enduring the same voltage and  $[Na^+]_o$  transmembrane gradients ( $-100$  mV and  $\sim 11.5Na^+_o:Na^+_i$ ),  
527 which will not change in response to a single stimulation. Consequently, APs of similar features  
528 should be generated at both membrane compartments (i.e. similar to the magenta trace in Figure  
529 1D); but if this was true, no significant  $Ca^{2+}$  release impairment was predicted at  $40$  mM  $Na^+_o$ .

530 Since the recorded MAPs originate mainly from the surface membrane, our results suggests a  
531 limitation in the radial propagation of APs as the main mechanism underlying  $Ca^{2+}$  release  
532 impairment at high membrane potential and lowered  $[Na^+]_o$ , a condition affording a maximal  
533 availability of both  $Na^+$  channels and the voltage sensor for ECC.

534 A simple speculation is that at  $-100$  mV, the t-tubule  $[Na^+]_o$  should be reduced to  $40$  mM to impair  
535 TTS AP generation and conduction, a corollary is that, in physiological conditions, the same  
536 effects should be reached at a much lower  $[Na^+]_o$  since  $[Na^+]_i$  is expected to significantly increase  
537 during repetitive stimulation.

538 Indirect evidence from other laboratories also supports a possible failure of radial propagation of  
539 APs in reduced  $[Na^+]_o$  [15, 18]. The larger diameter of frog fibers ( $\sim 65$   $\mu m$ , this work) as compared  
540 with that of mouse fibers ( $40$ - $50$   $\mu m$ , [19, 20]) should make the former more sensitive to low  
541  $[Na^+]_o$ .

542 Simply stated, in its current implementation, our method clearly show that the  $Ca^{2+}$  release failure  
543 at  $40$  mM  $Na^+_o$  and  $-100$  mV cannot be explained on the basis of the observed MAP changes.  
544 Although our approach cannot provide direct insight on TTS AP propagation, instead, since ECC  
545 only occurs at the TTS membrane, the fact that impaired  $Ca^{2+}$  transients are recorded embodies  
546 in itself the evidence suggesting such defective radial propagation.

547 This challenging possibility deserves further investigations by means of potentiometric detection  
548 of TTS APs [21, 22]; and/or confocal detection of  $Ca^{2+}$  release [23, 24]; and recordings of  $Ca^{2+}$   
549 release in electrically passive fibers under voltage-clamp conditions.

550  
551 **Effects of membrane depolarization on  $Ca^{2+}$  release in fibers exposed to various**  
552  **$[Na^+]_o$ .**

553 The experiments at different membrane potentials (Figures 2 and 3) confirmed our previous  
554 observations that depolarization has a dual effect on  $Ca^{2+}$  release triggered by single stimulation  
555 in fast frog muscle fibers exposed to physiological  $[Na^+]_o$  [7]. In spite of ample differences in  
556 experimental approaches, a similar voltage dependence of  $Ca^{2+}$  release on membrane potential  
557 was also confirmed in murine skeletal muscles using different temperatures and  $Ca^{2+}$  sensors  
558 ( $30^\circ C$  and Indo-1 [25];  $22^\circ C$  and GCAMP6f [26]). The fact that intact fibers from long muscles  
559 (EDL and soleus) were used in these studies reinforces the validity of our approach using cut  
560 fibers.

561  $Ca^{2+}$  release- $V_m$  plots clearly shows a potentiation branch in the range of  $-100$  to  $-60$  mV; and a  
562 steep depression branch, at more depolarized potentials. The maximal potentiation occurs at the  
563 rather depolarized membrane potential of  $-65$  mV (Figure 3, black trace and symbols). It is  
564 remarkable that  $Ca^{2+}$  release at  $-60$  mV is comparable to that at  $-100$  mV, and that robust  $Ca^{2+}$   
565 transients, about 50% the amplitude of those at  $100$  mV, can still be recruited at  $-55$  mV by MAPs



566 having an OS of merely ~5 mV. Data from frog muscle fibers, obtained at credible space clamp  
567 conditions, show that Na channels' availability is close to zero at -60 mV [27], and predicts that  
568 fibers should be mostly unexcitable at- and beyond this potential. Still, the possibility exist that  
569 the presence of CsF in the internal solution used in this work may have left shifted the voltage  
570 dependence of Na<sup>+</sup> channels' fast inactivation. Nevertheless, using normal [Ca<sup>+2</sup>]<sub>o</sub> and Cs-  
571 aspartate instead of CsF in the internal solution, our simulations of Na<sup>+</sup> currents for murine fibers  
572 suggest a similar voltage dependence of Na<sup>+</sup> channels inactivation [28]. Thus, a discrepancy  
573 between data obtained in voltage- and current-clamp experiments exists, and needs to be  
574 resolved.

575 Here we have extended our previous study [7] to three more [Na<sup>+</sup>]<sub>o</sub>. Experiments at lower than  
576 physiological [Na<sup>+</sup>]<sub>o</sub> led to three new findings.

577 A) A similar dual effect of depolarization on Ca<sup>+2</sup> release was found at 90 mM Na<sup>+</sup><sub>o</sub>, but in this  
578 condition, smaller potentiation at -65 mV and enhanced depression at -55 mV were seen. Clearly,  
579 those changes are due to Na<sup>+</sup><sub>o</sub> deprivation. Thus, reducing [Na<sup>+</sup>]<sub>o</sub> somehow counteract the  
580 mechanism leading to Ca<sup>+2</sup> release potentiation, and enhance the voltage-dependent mechanism  
581 that depress Ca<sup>+2</sup> release.

582 B) We found that, at all voltages explored, the peak Ca<sup>+2</sup> release is smaller in fibers exposed to 60  
583 mM Na<sup>+</sup><sub>o</sub> as compared with that at 115 and 90 mM Na<sup>+</sup><sub>o</sub>. Moreover, voltage-dependent  
584 potentiation, but not Ca<sup>+2</sup> release depression, is lost at this [Na<sup>+</sup>]<sub>o</sub> (Figure 2 and 3).

585 C) Interestingly, the depression branch of the voltage-dependence of Ca<sup>+2</sup> release shifts leftward  
586 as [Na<sup>+</sup>]<sub>o</sub> is lowered to 60 mM (Figures 3).

587 Altogether the results above demonstrate that Ca<sup>+2</sup> release is more sensitive to depolarization the  
588 lower the [Na<sup>+</sup>]<sub>o</sub>.

589 Potentiation may be explained by the depolarization-dependent increase in resting [Ca<sup>+2</sup>]<sub>i</sub> [7]. Our  
590 current observations are in agreement with previous data showing that conditioning subthreshold  
591 pulses and K-dependent depolarization can potentiate Ca<sup>+2</sup> release and twitch tension [7, 25, 30,  
592 31].

593 The lack of major effects of OS reduction on Ca<sup>+2</sup> release may be, in part, explained on the basis  
594 of the voltage dependence of Ca<sup>+2</sup> release (as measured in voltage clamp conditions), which  
595 saturates at about 20 mV [9, 10, 20]. Thus, in principle reducing the OS from 50 mV to ~20 mV  
596 may cause minor changes on the amplitude of Ca<sup>+2</sup> transients. Therefore, the difference between  
597 the V<sub>m</sub> at which the Ca<sup>+2</sup> release saturates and the OS represents a large safety factor for AP  
598 triggered ECC.

599 Several mechanisms can lead to Ca<sup>+2</sup> release depression, such as MAP impairing, radial  
600 propagation failure or inactivation of the ECC mechanism itself. Na<sup>+</sup> channel inactivation and  
601 reduced Na-EMF may underlie changes in MAPs and radial propagation. Reduced OS at 60 mM  
602 Na<sup>+</sup><sub>o</sub> (Figure 4) may overcome the effects of raised [Ca<sup>+2</sup>]<sub>i</sub>, thus preventing potentiation.

603 Drastic reduction of [Na<sup>+</sup>]<sub>o</sub> to 40 mM dwarfs Ca<sup>+2</sup> release at all membrane potentials tested  
604 (Figure 3). Remarkably, in this condition, relatively large MAPs are recorded between -100 and -  
605 70 mV (Figure 4), suggesting a radial conduction failure as the cause of Ca<sup>+2</sup> release impairment.  
606 These findings at 40 mM Na<sup>+</sup><sub>o</sub> extend those discussed above and uncover an apparent decoupling  
607 of Ca<sup>+2</sup> release from MAPs at all membrane potentials tested.

608 For each [Na<sup>+</sup>]<sub>o</sub> tested, depolarization from -100 to -70 mV have modest effects on Ca-FWHM,  
609 but in this range of membrane potentials, Ca<sup>+2</sup> transients at 60 and 40 mM Na<sup>+</sup><sub>o</sub> are longer lasting  
610 than those at 115 and 90 mM Na<sup>+</sup><sub>o</sub>. The Ca-FWHM at these two later [Na<sup>+</sup>]<sub>o</sub> were similar. The  
611 increased Ca-FWHM found at membrane potentials more positive than -70 mV (Figure 3) may  
612 help sustaining contractions in depolarized fibers.

613 **Effects of lowering  $[Na^+]_o$  on  $Ca^{+2}$  release in fibers polarized at various membrane**  
614 **potentials.**

615 The dependence  $Ca^{+2}$  release on  $[Na^+]_o$  is summarized in Figure 3B. Reductions of  $[Na^+]_o$  to 90  
616 mM (~20% below the physiological value) have no significant detrimental effects on  $Ca^{+2}$  release  
617 as far as the fibers are maintained at membrane potentials more negative than -60 mV (Figure  
618 3B, all traces). In fact, as seen in normal Ringer, potentiation of  $Ca^{+2}$  release ensues at this  $[Na^+]_o$   
619 along this voltage range. This demonstrates that, in the scenario of single stimulation, the ECC  
620 process has a large safety factor for both membrane depolarization (a 40 mV change) and  $Na^+$   
621 depletion (a 25 mM change), regardless these changes occur in isolation or in combination. In  
622 contrast, a larger reduction in  $Ca^{+2}$  release is found in response to a further 5 mV depolarization  
623 in fibers bathed in 90 mM  $Na^+$ , as compared with that found at 115 mM  $Na^+$ . This results shows  
624 that  $Na^+$  deprivation worsens the large depression of  $Ca^{+2}$  release seen at 115 mM  $Na^+$  and -55  
625 mV. This additional effect is due to the lower  $[Na^+]_o$  and is independent of the availability of  $Na^+$   
626 channels and ECC voltage sensor at -55 mV. Comparable  $[Na^+]_o$  changes are not expected to occur  
627 in either the plasma or the interstitial spaces of muscles stimulated repetitively [11], nonetheless,  
628 similar reductions in TTS luminal  $[Na^+]$  has been predicted to occur in <0.5 s in frog muscle fibers  
629 stimulated at 60 Hz (Figure 6 in [15]).

630 Even halving the physiological  $[Na^+]_o$  results in only a small reduction of  $Ca^{+2}$  release in fibers  
631 polarized to potentials more negative than -70 mV (Figure 3B); demonstrating that the ECC  
632 process operates within a large voltage safety factor when recruited by single stimulation in rested  
633 fibers. Nonetheless, depolarizations to -65 and -60 mV greatly impair ECC (Figure 3B, cyan and  
634 magenta traces). This result clearly shows that furthering  $[Na^+]_o$  deprivation increases the  
635 sensitivity of the ECC process to depolarization. The detrimental effects of  $Na^+$  deprivation is  
636 exemplified by the fact that membrane potentials affording potentiation at 115 and 90 mM  $Na^+$ ,  
637 lead to significant depression at 60 mM  $Na^+$ .

638 At extreme low values (i.e. 40 mM),  $[Na^+]_o$  becomes the limiting factor for ECC activation as  
639 shown by the abrupt depression of the  $Ca^{+2}$  release elicited at all potentials (Figure 3B, all traces).  
640 This manifests as an apparent decoupling of  $Ca^{+2}$  release from robust surface MAPs elicited from  
641 -100 to -65 mV.

642 Overall, our data demonstrate that in fast frog fibers ECC operates safely within large margins of  
643 membrane potentials and  $[Na^+]_o$  changes; and that independent or combined reductions of both  
644 parameters beyond safety limits impair  $Ca^{+2}$  release. In this way, depolarization renders the ECC  
645 process more sensitive to lowered  $[Na^+]_o$ ; and conversely, at lowered  $[Na^+]_o$ ,  $Ca^{+2}$  release  
646 depression occurs in response to smaller depolarizations.

647 The combined effects of both perturbations on  $Ca^{+2}$  release are complex (see Figure 7) and seem  
648 to be more than additive. Synergistic effects of increasing  $[K^+]_o$  (akin to current injection driven  
649 depolarization) and reducing  $[Na^+]_o$  on the mechanical output of rested muscles were first  
650 reported for frog muscles [11]. Here we present the first demonstration of similar effects of  
651 depolarization (mimicking the effects of raised  $[K^+]_o$  [7]) and  $[Na^+]_o$  deprivation on  $Ca^{+2}$  release.  
652 Our data show that the synergistic effects of  $[K^+]_o$  augmentation and  $[Na^+]_o$  deprivation on twitch  
653 force are mediated by similar effects on  $Ca^{+2}$  release exerted by depolarization and  $[Na^+]_o$   
654 deprivation. It should be noticed, nevertheless, that  $K^+$  exerts direct effects on ion transport  
655 mechanisms, relevant to AP conduction in the TTS, which are not mimicked by depolarization  
656 (this work). Raised  $K^+$  increases the conductance of the potassium inward rectifier channels [32,  
657 33]. While this has the beneficial effect of increasing  $K^+$  reuptake from the TTS [32], it also have  
658 the detrimental effect of reducing the space constant of the TTS, further compromising radial  
659 propagation. Increased  $K^+$  upregulated NaK-pump activity [34, 35]. This may help limiting  
660 changes in transmembrane  $K^+$  and  $Na^+$  gradients during activity [36], thus limiting fatigue  
661 development.

662 **The dependence of  $\text{Ca}^{+2}$  release on  $[\text{Na}^+]_o$  and  $V_m$  explains the effects of changes in**  
663  **$[\text{Na}^+]_o$  and  $[\text{K}^+]_o$  on twitch force.**

664 The resemblance between the dependence of  $\text{Ca}^{+2}$  release on resting membrane potential  
665 determined at various  $[\text{Na}^+]_o$  (Figure 3A, this work) and the dependence of twitch force on  $[\text{K}^+]_o$   
666 and  $[\text{Na}^+]_o$  (Figure 2A in [11]) is quite remarkable.

667 For single ion changes it was found [11] that at normal  $[\text{K}^+]_o$ , twitch force is practically insensitive  
668 to changes in  $[\text{Na}^+]_o$ ; while at normal  $[\text{Na}^+]_o$ , small increases in  $[\text{K}^+]_o$  potentiates twitch force, but  
669 large increases abolish force generation. Lowering  $[\text{Na}^+]_o$  reduces the potentiation effect of raising  
670  $[\text{K}^+]_o$ . Moreover a synergistic interaction between the effects of changes in both ions was found.  
671 Lowering  $[\text{Na}^+]_o$  reduces the force potentiation effect of increasing  $[\text{K}^+]_o$  and reduces the  $[\text{K}^+]_o$   
672 needed to depress force; i.e. the depression branch of the force- $[\text{K}^+]_o$  relationship shifts to the left.  
673 Finally, almost no force potentiation is seen at intermediate  $[\text{Na}^+]_o$ .

674 We found analogous changes in  $\text{Ca}^{+2}$  release in response to equivalent alterations of membrane  
675 potential and  $[\text{Na}^+]_o$ , demonstrating that twitch force potentiation or depression are mediated by  
676 equivalent changes in  $\text{Ca}^{+2}$  release.

677 Similarly, at physiological membrane potentials, the  $\text{Ca}^{+2}$  release (Figure 3B, this work) and the  
678 peak twitch tension show the same dependence on  $[\text{Na}^+]_o$  (Figure 2A in [6]). This demonstrates  
679 that in both frog and mouse the attenuation of peak twitch force observed at very low  $[\text{Na}^+]_o$  is  
680 mediated by a depression of  $\text{Ca}^{+2}$  release.

681 Overall, the changes in twitch force in response to individual or combined alterations of  $[\text{Na}^+]_o$   
682 and  $[\text{K}^+]_o$  are closely mirrored by changes in  $\text{Ca}^{+2}$  release in response to  $\text{Na}^+$  deprivation (at  
683 constant  $V_m$ ) and membrane depolarization (at constant  $\text{Na}^+$ ). Our current data suggests that  
684 the combined effects of raised  $[\text{K}^+]_o$  and reduced  $[\text{Na}^+]_o$  on twitch force are independent, at least  
685 in part, from the presence of  $\text{K}^+$  per se, but are instead mediated by  $\text{K}^+$ -dependent membrane  
686 depolarization [7].

687 Consequently, our study is the first direct demonstration that the modulation of twitch force  
688 generation by changes in  $[\text{Na}^+]_o$  and/or  $[\text{K}^+]_o$  is mediated by the effects that those changes exert  
689 on  $\text{Ca}^{+2}$  release. Before our work, the mechanism underlying force dependence on  $\text{Na}^+$  and  $\text{K}^+$   
690 could only be anticipated [11]. The next question to answer is how depolarization (or raised  $\text{K}^+$ )  
691 and/or  $\text{Na}^+$  deprivation limits  $\text{Ca}^{+2}$  release?

692  
693 **Voltage- and  $[\text{Na}^+]_o$ -dependent MAP overshoot changes do not correlate with**  
694 **changes in  $\text{Ca}^{+2}$  release**

695 It is well established that the ECC process in skeletal fibers is only recruited, in a graded and  
696 saturable fashion, by TTS membrane depolarization. Since in physiological conditions  $\text{Ca}^{+2}$   
697 release is triggered by  $\text{Na}^+$ -dependent APs propagating radially in the TTS, it is conceivable that  
698 factors altering the generation or waveform (e.g. amplitude, OS, duration) of those APs will in  
699 turn alter  $\text{Ca}^{+2}$  release. Consequently, understanding how  $\text{K}^+$ -dependent depolarization and  $\text{Na}^+$   
700 deprivation affect the generation and waveform of APs may help explaining how  $\text{K}^+$  accumulation  
701 (membrane depolarization) and  $\text{Na}^+$  deprivation affects  $\text{Ca}^{+2}$  release and ultimately force  
702 generation. We first looked at the voltage- and  $[\text{Na}^+]_o$ -dependence of the OS and compared them  
703 with those of the  $\text{Ca}^{+2}$  release.

704 Our previous (Figure 5C in [7]) and current data (Figure 4) concur with previously published  
705 relationships between AP OS and  $[\text{K}^+]_o$  (Figure 5 in [4]),  $[\text{Na}^+]_o$  (Figure 6 in [6]), and membrane  
706 potential (Figure 2E in [26]). Here we have extended those studies to a larger number of  
707 conditions.

708 According to the  $\text{Na}^+$  hypothesis for muscle fatigue [6] impaired mechanical output can be  
709 explained on the basis of a reduction of  $\text{Na}^+$ -EMF predicted from  $\text{Na}^+$  depletion (mainly at the TTS  
710 lumen) and  $\text{Na}^+$  accumulation during sustained activity. Since the ENa sets the maximal  
711 depolarization reachable during an AP, this will translate to a reduced OS. At constant  $[\text{Na}^+]_o$ , the  
712 OS is also reduced by depolarizations through voltage-dependent inactivation of  $\text{Na}^+$  channels.

713 Accordingly, independently or in combination, depolarization in our case (or increased  $[K^+]_o$  in  
714 other studies) and  $Na^+_o$  deprivation are expected to reduce  $Ca^{+2}$  release via a reduction of the OS.  
715 Our results from single stimulation experiments does not concur with this prediction, instead a  
716 complex relationship between  $Ca^{+2}$  release and OS was determined (Figure 8, see also Figure 9).  
717 The insensitivity of  $Ca^{+2}$  release to OS changes at various  $[Na^+]_o$  and membrane potentials  
718 suggests it is not the only factor determining the  $Ca^{+2}$  transient peak. Others have previously  
719 shown that force generation is relatively insensitive to reduced OS resulting from partial  $Na^+$   
720 channel blockage or reduced ENa at low  $[Na^+]_o$  [6, 15, 37].

721 In our case, two extreme experimental conditions exemplify the apparent anomalous relationship  
722 between the OS and  $Ca^{+2}$  release elicited by single stimulation (Figure 8); a)  $Ca^{+2}$  release is  
723 potentiated in conditions that reduce the OS (e.g. -75 to -60 mV, 115 to 90 mM  $Na^+_o$ ; Figure 8,  
724 cyan arrow). In contrast, the OS depends monotonically on both depolarization and lowered  $Na^+_o$   
725 (Figure 4); b) Ca release is almost abolished in conditions that allow for large OSs (e.g. -100 to -  
726 70 mV, 40 mM  $Na^+_o$ ; Figure 8, magenta arrow). In other conditions (-70 to -55 mV, 115 to 60 mM  
727  $Na^+_o$ ; Figure 8, brown arrow), the peak of the  $Ca^{+2}$  transients declines monotonically as OS is  
728 reduced.

729 The observed dissociation between OS and  $Ca^{+2}$  transient peak may be wrongly interpreted as a  
730 decoupling between TTS APs and  $Ca^{+2}$  release, but this is only apparent; a distinction needs to be  
731 made between MAPs (or longitudinally propagated APs) and TTS APs as this fact is usually  
732 overlooked. Many published evidences suggest that OS is not an appropriate figure of merit to  
733 predict  $Ca^{+2}$  release or contraction [6, 7, 15, 37]. Since MAPs and ECC occurs at different  
734 membranes, it is possible that MAPs or longitudinally propagated APs can be elicited in  
735 conditions limiting or preventing AP propagation along the TTS membranes, as seen, for example,  
736 at 40 mM  $Na^+_o$  (or repetitive stimulation, see below). In this conditions, robust MAPs can be  
737 elicited but only small  $Ca^{+2}$  transients are recruited. While impaired  $Ca^{+2}$  release attests in itself  
738 to a TTS AP propagation failure, a direct test of this possibility is missing. An alternative condition,  
739 preventing longitudinally propagated APs or MAPs but allowing radial propagation is difficult to  
740 conceive. In physiological conditions, longitudinal propagation is the only way to convey APs  
741 initially generated at the neuromuscular junction to t-tubule openings.

742 Intrinsic differences between the surface and TTS membranes may be at the root of the seemingly  
743 differential sensitivity of both compartments to the same depolarization and  $Na^+_o$  deprivation,  
744 thus explaining TTS AP propagation failure in the presence of robust MAPs. The TTS is a  
745 diffusion-limited convoluted compartment with mostly unknown space constant and luminal  
746 conductivity. The TTS is delimited by a membrane of different lipid composition and lipid order  
747 as compared with those of the surface membrane [38, 39]; and lipids (e.g. cholesterol) are known  
748 to modulate ion channel activity [40]. The actual endowment of ion transport systems in the TTS  
749 is still a matter of debate (see for example [41-43]), but most probably, it is different from that of  
750 the surface membrane in terms of channel density, stoichiometry, and isoforms present. For  
751 example, different isoforms of the NaK-pump are present at each membrane compartment of  
752 murine muscle fibers, making them physiologically different [34, 44]. Although only one  $Na^+$   
753 channel isoform prevails in adult fibers ( $NaV1.1$ ),  $Na^+$  channels at the TTS and surface membranes  
754 may work differently due to differences in lipid environment.

755 It should be noted that, at the level of single fibers, radial gradients of ion concentrations and  
756 membrane potential are not expected to occur in our single stimulation experiments, but may play  
757 a key role during sustained activity. In physiological conditions, radial gradients of membrane  
758 potential and ion concentrations predict close to normal APs at the surface membrane but  
759 impaired TTS APs, worsening towards the fiber center.

760 One important factor for the generation and conduction of APs, particularly in the TTS, usually  
761 overlooked is the “resting” (or pre-stimulus) membrane conductance [45]. The main ionic  
762 conductances contributing to the resting conductance are expected to increase during sustained  
763 activation. The chloride conductance will increase due to depolarization per se [42], and the



764 potassium inward rectifier conductance will increase due to its dependence on  $[K^+]$  [32]. Both of  
765 this factors will reduce the space constant of the TTS, compromising the generation and  
766 conduction of APs.

767

### 768 **MAP duration and $Ca^{+2}$ release**

769 The MAP duration is also expected to affect the features of  $Ca^{+2}$  release. We used two parameters  
770 to assess the MAP duration, the FWHM and the RET (see Methods). The first is a standard way of  
771 measuring the duration of waveforms, the second was conceived from the classical mechanical  
772 effective time [11, 12] and the membrane potential threshold for  $Ca^{+2}$  release [9, 10].

773 The MAP-FWHM measured here (Figure 5A) showed a voltage dependence similar to that  
774 previously reported (Figure 5D in [7]). Nevertheless, while we found that for all  $[Na^+]_o$  used, MAPs  
775 shorten as fibers are depolarized from -100 to -70 mV, it was previously reported that AP FWHM  
776 is almost insensitive to depolarization along a (predictable) similar range of potential (Figure 5B  
777 in [4]).

778 Since, unexpectedly, the voltage dependence of MAP-FWHM and  $Ca^{+2}$  release seem to be  
779 negatively correlated (compare Figures 3A and 5A), we resorted to measure MAP-RET (Figure  
780 5B). While in the range of -100 to -70 mV, MAP RET better correlate with  $Ca^{+2}$  release, it still  
781 show a negative correlation with  $Ca^{+2}$  release for further depolarization (Figure 5B).

782 Since the OS and the RET have similar apparent voltage independence between -100 and -70 mV,  
783 but opposite voltage dependence in the range of -70 to -55 mV, we reasoned that the product of  
784 both parameters (OSxMAP-RET) may better correlate with  $Ca^{+2}$  release (Figure 9). In fact, we  
785 found that the voltage dependence of OSxMAP-RET closely approximate the voltage dependence  
786 of  $Ca^{+2}$  release at  $[Na^+]_o$  between 115 and 60 mM (Figures 9A-9C). As expected no correlation was  
787 found at 40 mM  $Na^+_o$ . This was confirmed by plotting the  $Ca^{+2}$  transient peaks as a function of  
788 OSxMAP-RET determined at the same  $V_m$  and  $[Na^+]_o$ . A high correlation was determined for the  
789 data at 115-60 mM  $Na^+_o$  (Figure 7E, see legend for  $R^2$  values), suggesting a causative relationship  
790 between both parameters. A similar correlation between the peak of  $Ca^{+2}$ -dependent fluorescence  
791 transients and the area of APs was recently described [26].

792

### 793 **$Na^+_o$ deprivation and depolarization impair $Ca^{2+}$ release in rested fibers stimulated 794 at 100Hz**

795 Tetanic force is more sensitive to  $[Na^+]_o$  deprivation or increased  $[K^+]_o$  than twitch tension, and  
796 this two factors have been shown to synergistically impair tetanic force generation [11]. A similar  
797 study of  $Ca^{2+}$  release in these conditions was missing, thus we measured, in a relatively small  
798 number of fibers,  $Ca^{2+}$  transients elicited by short, 100 Hz trains in rested fibers exposed to 115-  
799 40 mM  $Na^+_o$  and maintained at holding potentials between -100 and -55 mV (Figures 6 and 7).

800 Our approach is able to resolve the  $Ca^{2+}$  release events elicited by each pulse of the trains,  
801 providing a continuous quantitative readout of  $[Ca^{2+}]_i$  changes and simultaneous recordings of  
802 the underlying MAPs.

803 Notably, our data demonstrate that fibers chronically exposed to  $[Na^+]_o$  as low as half the  
804 physiological value can generate close to normal  $Ca^{2+}$  transients at a frequency of 100 Hz as far as  
805 the membrane potential is more negative than -80 mV.

806 In this conditions, robust MAPs are elicited and, in agreement with single pulse experiments,  
807 potentiation of the first  $Ca^{+2}$  transient of each train is seen at 115 and 90 mM  $Na^+_o$ , but not at 60  
808 mM  $Na^+_o$  (Figure 6-7).

809 At this range of membrane potentials a high  $g_{Na}$  is expected, consequently the relatively small  
810 reduction of the OS observed is mainly due to the imposed reduction in  $E_{Na}$ . The results suggest  
811 that  $g_{Na}$  is the predominant factor governing the ECC process in this conditions, for this reason  
812  $Ca^{+2}$  release seems immune to reduced  $[Na^+]_o$ .

813 Interestingly, at 115 and 90 mM  $[Na^+]_o$ ,  $Ca^{+2}$  release from the second pulse is compromised,  
814 regardless the first  $Ca^{+2}$  transient is potentiated, if the fibers are depolarized to -60 mV (Figures

815 6C and 6G). At this potential a reduced  $g_{Na}$  is expected; and this may explain why MAPs have  
816 smaller OSs. However, this cannot explain why the pattern of  $Ca^{+2}$  release is irregular while that  
817 of MAP generation is not. The results suggests that, notwithstanding  $[Na^+]_o$  is high, at potentials  
818 that predicts a reduced  $g_{Na}$ , the ECC process cannot respond normally at high frequency. The  
819 abnormal response to high frequency stimulation and the fact that the first  $Ca^{+2}$  transient of the  
820 train is normal is another example of an apparent disconnection between  $Ca^{+2}$  release and MAP  
821 features. One possible explanation is that the surface and TTS membranes respond differentially  
822 to the repetitive stimulation. In practical terms, these findings suggest that during repetitive  
823 stimulation the propagation mechanism along the TTS or the  $Ca^{+2}$  release mechanism has a lower  
824 safety factor in comparison to that observed in response to single stimulation.

825 Lowering  $[Na^+]_o$  to 60 mM further compromise the response of the ECC process to tetanic  
826 stimulation, since  $Ca^{+2}$  release failure is observed at more negative membrane potentials (i.e. -70  
827 mV), no matter the MAPs has a much larger amplitude than that of those recorded at -65 mV in  
828 fibers exposed to 115 and 90 mM  $Na^+_o$  (Figure 6C and 6D). A larger  $g_{Na}$ , as expected at -70 mV,  
829 may explain why the MAPs are larger at a lower  $[Na^+]_o$ , but is at odds with the ECC failure.  
830 Therefore, lowering  $[Na^+]_o$  to 60 mM seems to further reduce the safety factor for  $Ca^{+2}$  release  
831 during repetitive stimulation. In these conditions, it seems that the  $[Na^+]_o$  is the predominant  
832 factor determining the apparent decoupling of the ECC process from (surface membrane) MAPs.  
833 As expected from single pulse stimulation,  $Ca^{+2}$  release failed at all potentials when extremely low  
834  $[Na^+]_o$  even though MAP have large OSs (Figure 6E-6H).

835 As for single stimulation, we find that the OS per se fail to predict  $Ca^{+2}$  release in most conditions  
836 explored. The most dramatic demonstration of this is seen at 40 mM  $Na^+_o$ , robust MAPs, with OSs  
837 between 20 and 30 mV, failed to elicit normal  $Ca^{+2}$  release even in response of the first pulse of  
838 the trains. For  $[Na^+]_o$  from 115 to 60 mM, Ca release failure at extreme depolarization was not due  
839 to failing MAP generation (Figures 5D and 6H, Figure 7D). Ca release can either be defective or  
840 fail along the trains while non-skipping, regenerative responses (MAPs) may peak between -5 and  
841 20 mV are simultaneously recorded.

842 It should be noted that, in agreement with force measurements [11], aside for the response to the  
843 first stimulus, at none of the conditions studied,  $Ca^{+2}$  release was potentiated during the trains;  
844 all the experimental conditions tested resulted in no effect or depression of  $Ca^{+2}$  release.

845 Overall, our results demonstrate that  $Ca^{+2}$  release in response to repetitive stimulation is more  
846 sensitive to depolarization (and thus, to increased  $K^+_o$ ) and  $Na^+_o$  deprivation than  $Ca^{+2}$  release  
847 elicited by single stimulus. Moreover, as for single stimulation, when imposed in combination,  
848 depolarization and  $Na^+_o$  deprivation seem to synergistically impair  $Ca^{+2}$  release in response to  
849 repetitive stimulation; as reported for tetanic force force [11]. A likely explanation for the effects  
850 of these two factors is a depression of the generation and conduction of APs along the TTS.  
851 However, possible alterations of other steps of the ECC during repetitive activation needs to be  
852 determined.

853 Our data provide, for the first time, a mechanism to explain how  $Na^+_o$  deprivation and  $K^+_o$   
854 accumulation cause depression of tetanic force, and why  $K^+_o$  accumulation potentiates twitch  
855 force but does not cause tetanic force potentiation.

### 856 857 **Further directions**

858 The present work extends our previous study on the influence of changes in the  $[K^+]_o$  and  
859 membrane depolarization on  $Ca^{+2}$  release [7]. Although amphibian muscles were used, both  
860 works provided novel insights on the mechanisms of muscle fatigue in particular and ECC in  
861 general. We plan to perform a similar study in myosin-typified mammalian muscle fibers  
862 maintained at close to physiological conditions. Combining electrophysiological and optical  
863 techniques [21, 32] and working in both current- and voltage-clamp conditions, the immediate  
864 goal is to directly assess the generation and propagation of APs along the TTS and the response of  
865 subsequent events of the ECC process to repetitive stimulation and changes in external ion



866 concentrations and membrane potential. The long term goal is to accomplish similar studies in  
867 human muscle fibers. We have already demonstrated the feasibility of using our experimental  
868 approach to study the ECC process in fibers obtained from human biopsies [46], which are  
869 otherwise inaccessible to most standard electrophysiological techniques.

870  
871 **Summary**

872 The effects of depolarization and  $\text{Na}^+$  deprivation of Ca release elicited by single stimulation can  
873 be summarized as follows: a) Depolarization has a dual effect on  $\text{Ca}^{2+}$  release. At physiological  
874  $[\text{Na}^+]_o$ , depolarizations to values more negative than -60 mV produce  $\text{Ca}^{2+}$  release potentiation,  
875 and depolarizations to values more positive than -60 produce a steep depression of Ca release.  
876 b)  $\text{Na}^+$  deprivation has a monotonic detrimental effect on  $\text{Ca}^{2+}$  release. Potentiation is reduced at  
877 90 mM  $\text{Na}^+$  and eliminated at 60 mM  $\text{Na}^+$ . At both  $[\text{Na}^+]_o$ , voltage-dependent depression of  $\text{Ca}^{2+}$   
878 release occurs at membrane potentials more negative than -60 mV. At 40 mM  $\text{Na}^+$ ,  $\text{Ca}^{2+}$  release  
879 is partially decoupled from MAPs.

880 At  $[\text{Na}^+]_o$  larger than 60 mM fibers can produce normal  $\text{Ca}^{2+}$  transients at 100 Hz if polarized to  
881 membrane potentials more negative than -80 mV. Larger depolarization impair Ca release along  
882 100 Hz trains. In fibers polarized between -100 and -70 mV,  $\text{Ca}^{2+}$  release decouples from close to  
883 normal trains of MAPs, when exposed to 40 mM  $\text{Na}^+$ .

884 The effects of depolarization and  $\text{Na}^+$  deprivation synergistically depress  $\text{Ca}^{2+}$  release.

885 The OS and duration of MAPs are not figures of merit to predict  $\text{Ca}^{2+}$  release; the parameter  
886  $\text{OS} \times \text{MAP-RET}$  better correlates with the peak of  $\text{Ca}^{2+}$  transients.

887 We proposed that a compromised TTS AP generation and/or conduction, not MAP impairment,  
888 may explain the detrimental effects of depolarization and  $\text{Na}^+$  deprivation on  $\text{Ca}^{2+}$  release.

889 We conclude that the effects of increased  $\text{K}^+$  and  $\text{Na}^+$  deprivation on twitch and tetanic force  
890 generation of rested fibers can be explained on the basis of the effects of membrane depolarization  
891 and  $\text{Na}^+$  deprivation on  $\text{Ca}^{2+}$  release.

892 **Funding**

893 This work was supported by CONICIT grant S1-805 to MD.

894

895 **Acknowledgments**

896 This work is part of MQ Ph.D dissertation Thesis.

897

898 **Conflict of interest.**

899 The author declare no conflict of interest.

900 **Figure Legends**

901 **Figure 1. Ca<sup>+2</sup> release elicited by single pulse stimulation in fibers maintained at -**  
902 **100 mV and exposed to various [Na<sup>+</sup>]<sub>o</sub>.**

903 **A.** The black, blue and red traces represent, respectively, the Ca<sup>+2</sup> transients recorded from a fiber  
904 exposed successively to at 115, 90 and 60 mM Na<sup>+</sup><sub>o</sub>.

905 The green trace represents the Ca<sup>+2</sup> transient recorded after returning to 115 from 60 mM Na<sup>+</sup><sub>o</sub>.

906 **B.** MAPs recorded simultaneously with each of the Ca<sup>+2</sup> transients shown in A, represented using  
907 the same color coding as in A.

908 **C.** Ca<sup>+2</sup> transients recorded in another fiber exposed successively to 115 (black trace) and 40 mM  
909 Na<sup>+</sup><sub>o</sub> (magenta trace).

910 **D.** MAPs eliciting the Ca<sup>+2</sup> transients shown in C. The same color coding as a in C was used.

911 The inset in each panel shows the corresponding Ca<sup>+2</sup> transients or MAPs in an expanded time  
912 scale.

913 Notice that, for all panels, two different time scales are used in the insets for Ca<sup>+2</sup> transients and  
914 MAPs.

915  
916 **Figure 2. Effects of steady depolarization on the Ca<sup>+2</sup> transients recorded from**  
917 **fibers exposed to various [Na<sup>+</sup>]<sub>o</sub>.**

918 Ca<sup>+2</sup> transients (top panels) and their corresponding MAPs (bottom panels) recorded from fibers  
919 bathed in 115, 90, 60 and 40 mM Na<sup>+</sup><sub>o</sub>, and maintained at various membrane potentials, as  
920 indicated by the color bars.

921 **A-B.** Records at 115 mM Na<sup>+</sup><sub>o</sub>.

922 **C-D.** Records at 90 mM Na<sup>+</sup><sub>o</sub>.

923 **E-F.** Records at 60 mM Na<sup>+</sup><sub>o</sub>.

924 **G-H.** Records at 40 mM Na<sup>+</sup><sub>o</sub>.

925 For each [Na<sup>+</sup>]<sub>o</sub>, different holding potentials are used, records at each condition are color coded.

926 The same color is used for simultaneously recorded Ca<sup>+2</sup> transients and MAPs.

927 The inset in each panel shows the corresponding Ca<sup>+2</sup> transients or MAPs in an expanded time  
928 scale.

929 Notice that, for all panels, two different time scales are used in the insets for Ca<sup>+2</sup> transients and  
930 MAPs.

931  
932 **Figure 3. Dependence of Ca<sup>+2</sup> transients' peak and duration on the membrane**  
933 **potential and [Na<sup>+</sup>]<sub>o</sub>.**

934 **A.** Voltage dependence of the Ca<sup>+2</sup> transient's peak. Data points represent the means of Ca<sup>+2</sup>  
935 transients' peaks recorded at -100, -90, -80, -70, -60 and -55 mV from fibers exposed to 115 (black  
936 line and symbols), 90 (red line and symbols), 60 (blue line and symbols) and 40 mM Na<sup>+</sup><sub>o</sub> (green  
937 line and symbols).

938 **B.** Dependence of the Ca<sup>+2</sup> transient's peak on [Na<sup>+</sup>]<sub>o</sub>. The data in A are plotted as a function of  
939 [Na<sup>+</sup>]<sub>o</sub>, the error bars are omitted for clarity. The holding potential (-100, -90, -80, -70, -65, -60  
940 and -5 mV) is color coded as indicated by the colored horizontal bars.

941 **C.** Voltage dependence of the Ca-FWHM. Data points represent the means of FWHM of Ca<sup>+2</sup>  
942 transients recorded from fibers maintained at -100, -90, -80, -70, -60 and -55 mV and exposed to  
943 115 (black line and symbols), 90 (red line and symbols), 60 (blue line and symbols) and 40 mM  
944 Na<sup>+</sup><sub>o</sub> (green line and symbols). Same population of fibers as in A.

945 **D.** Dependence of the Ca-FWHM on the [Na<sup>+</sup>]<sub>o</sub>. The data in C are plotted as a function of [Na<sup>+</sup>]<sub>o</sub>,  
946 the error bars are omitted for clarity. The holding potential used is color coded as indicated by the  
947 color horizontal bars.

948 Symbols represents mean ± SE. n=7, 6, 5, 3 for experiments at 115, 90, 60 and 40 mM Na<sup>+</sup><sub>o</sub>.

949 Asterisks indicate statistical difference from data at -100 mV.

950

951 **Figure 4. Dependence of MAP overshoot on holding potential and  $[Na^+]_o$ .**  
952 **A.** The OS is plotted as a function of the membrane potential. Data points are the mean OS  
953 determined from MAPs recorded at -100, -90, -80, -70, -60 and -55 mV from fibers bathed in 115  
954 (black line and symbols), 90 (red line and symbols), 60 (blue line and symbols) and 40 mM N  
955 (green line and symbols).  
956 **B.** Dependence of the OS on the  $[Na^+]_o$ . Data in A are plotted as a function of  $[Na^+]_o$ . Error bars  
957 are omitted for clarity. Each plot represent data obtained at the same holding potential (-100, -  
958 90, -80, -70, -60 and -55 mV), as indicated by the colored horizontal bars.  
959 Symbols are mean  $\pm$  SE. Asterisks indicate statistical difference from data at -100 mV.

960  
961 **Figure 5. Voltage dependence of MAP FWHM and DUR-40**  
962 **A.** The FWHM of MAPs recorded in fibers exposed to various  $[Na^+]_o$  is plotted as a function of  
963 holding potential (Vm). The  $[Na^+]_o$  (115, 90, 60 and 40 mM) is color coded as indicated by the  
964 colored bar.  
965 **B.** The RET of MAPs recorded in fibers exposed to various  $[Na^+]_o$  is plotted as a function of holding  
966 potential (Vm). The  $[Na^+]_o$  (115, 90, 60 and 40 mM) is color coded as indicated by the colored bar.  
967 Symbols are mean  $\pm$  SE. Asterisks indicate statistical difference from data at -100 mV.

968  
969 **Figure 6. Effects of membrane potential on the  $Ca^{+2}$  release elicited by high**  
970 **frequency stimulation in fibers bathed in Ringer containing 115 or 90 mM  $Na^+$ .**  
971 Top and bottom panels for each condition show the  $Ca^{+2}$  transients and their corresponding  
972 MAPs, respectively. Recordings were obtained from fibers maintained at the indicated holding  
973 potentials and exposed to either 155 (black traces) or 90 mM  $[Na^+]_o$  (red traces). A 100 ms, 100  
974 Hz train of supra-threshold pulses was used to stimulate the fibers.  
975 Similar responses were recorded in 4 different fibers for each 115 and 90  $Na^+$ .

976  
977 **Figure 7. Effects of membrane potential on the  $Ca^{+2}$  release elicited by high**  
978 **frequency stimulation in fibers bathed in Ringer containing 60 or 40 mM  $Na^+$ .**  
979 Top and bottom panels for each condition show the  $Ca^{+2}$  transients and their corresponding  
980 MAPs, respectively. Recordings were obtained from fibers maintained at the indicated holding  
981 potentials and exposed to either 60 (blue traces) or 40 mM  $[Na^+]_o$  (green traces). A 100 ms, 100  
982 Hz train of supra-threshold pulses was used to stimulate the fibers.  
983 Similar responses were recorded in 4 different fibers for 60 and 3 fibers for 40  $Na^+$ .

984  
985 **Figure 8. Relationship between the peak of  $Ca^{+2}$  transients and the overshoot of**  
986 **MAPs.**  
987 The peak of  $Ca^{+2}$  transients are plotted as a function of the OS. Lines and symbols represent data  
988 obtained at 115 (black line and symbols), 90 (red line and symbols), 60 (blue line and symbols)  
989 and 40 mM  $Na^+$  (green line and symbols). The cyan arrow indicates potentiation of  $Ca^{+2}$   
990 transients as the OS is reduced from 50 to 40 mV. The magenta arrow indicates the depression of  
991  $Ca^{+2}$  transients at 40 mM  $Na^+$  and large OSs. The brown arrow indicates a monotonic relationship  
992 between the  $Ca^{+2}$  transient's peak and MAP FWHM.

993  
994 **Figure 9. Correlation between the peak of  $Ca^{+2}$  transients and OSxMAP-RET**  
995 **A-D.** The MAP-RET, the peak of the  $Ca^{+2}$  transients (Peak- $Ca^+$ ), the OS and the product of the OS  
996 times Map-RET (OSxMAP-RET) measured at 115, 90, 60 and 40 mM  $Na^+$  were normalized and  
997 plotted as a function of the holding potential (Vm). The  $[Na^+]_o$  is color coded as indicated by the  
998 colored bars. Each parameter was normalized to its value at -100 mV (indicated in each panel by  
999 the dashed lines).  
1000 **E.** Correlation between the peak of  $Ca^{+2}$  transients and OSxMAP-RET. The peak of  $Ca^{+2}$  transients  
1001 determined at 115, 90 and 60 mM  $[Na^+]_o$  are plotted as a function of the corresponding OSxMAP-

1002 RET. The data points for each  $[\text{Na}^+]_o$  were fitted to linear regressions. The  $R^2$  values were 0.99,  
1003 0.94, 0.98 and 0.47 for data obtained at 115, 90, 60 and 40 mM  $[\text{Na}^+]_o$ , respectively. The data for  
1004 40 mM  $[\text{Na}^+]_o$  are not shown. The  $[\text{Na}^+]_o$  is color coded as indicated by the colored horizontal bars.

1005 **References**

- 1006
- 1007 1. Edwards, R.H., *Human muscle function and fatigue*. Ciba Found Symp, 1981. **82**:
- 1008 p. 1-18.
- 1009 2. Allen, D.G., G.D. Lamb, and H. Westerblad, *Skeletal muscle fatigue: cellular*
- 1010 *mechanisms*. *Physiol Rev*, 2008. **88**(1): p. 287-332.
- 1011 3. Juel, C., *Potassium and sodium shifts during in vitro isometric muscle contraction,*
- 1012 *and the time course of the ion-gradient recovery*. *Pflugers Arch*, 1986. **406**(5): p.
- 1013 458-63.
- 1014 4. Renaud, J.M. and P. Light, *Effects of K<sup>+</sup> on the twitch and tetanic contraction in*
- 1015 *the sartorius muscle of the frog, Rana pipiens. Implication for fatigue in vivo*. *Can*
- 1016 *J Physiol Pharmacol*, 1992. **70**(9): p. 1236-46.
- 1017 5. Bigland-Ritchie, B., D.A. Jones, and J.J. Woods, *Excitation frequency and muscle*
- 1018 *fatigue: electrical responses during human voluntary and stimulated contractions*.
- 1019 *Exp Neurol*, 1979. **64**(2): p. 414-27.
- 1020 6. Cairns, S.P., et al., *Changes of action potentials and force at lowered [Na<sup>+</sup>]<sub>o</sub> in*
- 1021 *mouse skeletal muscle: implications for fatigue*. *Am J Physiol Cell Physiol*, 2003.
- 1022 **285**(5): p. C1131-41.
- 1023 7. Quinonez, M., et al., *Effects of membrane depolarization and changes in*
- 1024 *extracellular [K<sup>+</sup>] on the Ca<sup>2+</sup> transients of fast skeletal muscle fibers.*
- 1025 *Implications for muscle fatigue*. *J Muscle Res Cell Motil*, 2010. **31**(1): p. 13-33.
- 1026 8. DiFranco, M., et al., *Inverted double-gap isolation chamber for high-resolution*
- 1027 *calcium fluorimetry in skeletal muscle fibers*. *Pflugers Arch*, 1999. **438**(3): p. 412-
- 1028 8.
- 1029 9. Ursu, D., R.P. Schuhmeier, and W. Melzer, *Voltage-controlled Ca<sup>2+</sup> release and*
- 1030 *entry flux in isolated adult muscle fibres of the mouse*. *Journal of Physiology*, 2005.
- 1031 **562**(Pt 2): p. 347-65.
- 1032 10. Wang, Z.M., M.L. Messi, and O. Delbono, *Patch-clamp recording of charge*
- 1033 *movement, Ca<sup>2+</sup> current, and Ca<sup>2+</sup> transients in adult skeletal muscle fibers*.
- 1034 *Biophysical Journal*, 1999. **77**(5): p. 2709-16.
- 1035 11. Bouclin, R., E. Charbonneau, and J.M. Renaud, *Na<sup>+</sup> and K<sup>+</sup> effect on contractility*
- 1036 *of frog sartorius muscle: implication for the mechanism of fatigue*. *Am J Physiol*,
- 1037 1995. **268**(6 Pt 1): p. C1528-36.
- 1038 12. Sandow, A., S.R. Taylor, and H. Preiser, *Role of the action potential in excitation-*
- 1039 *contraction coupling*. *Fed Proc*, 1965. **24**(5): p. 1116-23.
- 1040 13. Sjogaard, G., R.P. Adams, and B. Saltin, *Water and ion shifts in skeletal muscle*
- 1041 *of humans with intense dynamic knee extension*. *Am J Physiol*, 1985. **248**(2 Pt 2):
- 1042 p. R190-6.
- 1043 14. Lindinger, M.I. and G.J. Heigenhauser, *The roles of ion fluxes in skeletal muscle*
- 1044 *fatigue*. *Can J Physiol Pharmacol*, 1991. **69**(2): p. 246-53.
- 1045 15. Bezanilla, F., et al., *Sodium dependence of the inward spread of activation in*
- 1046 *isolated twitch muscle fibres of the frog*. *J Physiol*, 1972. **223**(2): p. 507-23.
- 1047 16. Jones, D.A., B. Bigland-Ritchie, and R.H. Edwards, *Excitation frequency and*
- 1048 *muscle fatigue: mechanical responses during voluntary and stimulated*
- 1049 *contractions*. *Exp Neurol*, 1979. **64**(2): p. 401-13.
- 1050 17. Cairns, S.P. and M.I. Lindinger, *Do multiple ionic interactions contribute to skeletal*
- 1051 *muscle fatigue?* *J Physiol*, 2008. **586**(Pt 17): p. 4039-54.



- 1052 18. Nakajima, S., Y. Nakajima, and J. Bastian, *Effects of sudden changes in external*  
1053 *sodium concentration on twitch tension in isolated muscle fibers*. J Gen Physiol,  
1054 1975. **65**(4): p. 459-82.
- 1055 19. Capote, J., M. DiFranco, and J.L. Vergara, *Excitation-contraction coupling*  
1056 *alterations in mdx and utrophin/dystrophin double knockout mice: a comparative*  
1057 *study*. American Journal of Physiology - Cell Physiology, 2010. **298**(5): p. C1077-  
1058 86.
- 1059 20. DiFranco, M., et al., *Functional expression of transgenic alpha 1sDHPR channels*  
1060 *in adult mammalian skeletal muscle fibres*. Journal of Physiology-London, 2011.  
1061 **589**(6): p. 1421-1442.
- 1062 21. DiFranco, M., J. Capote, and J.L. Vergara, *Optical imaging and functional*  
1063 *characterization of the transverse tubular system of mammalian muscle fibers*  
1064 *using the potentiometric indicator di-8-ANEPPS*. J Membr Biol, 2005. **208**(2): p.  
1065 141-53.
- 1066 22. Banks, Q., et al., *Optical Recording of Action Potential Initiation and Propagation*  
1067 *in Mouse Skeletal Muscle Fibers*. Biophysical Journal, 2018. **115**(11): p. 2127-  
1068 2140.
- 1069 23. Gomez, J., et al., *Calcium release domains in mammalian skeletal muscle studied*  
1070 *with two-photon imaging and spot detection techniques*. J Gen Physiol, 2006.  
1071 **127**(6): p. 623-37.
- 1072 24. Novo, D., M. DiFranco, and J.L. Vergara, *Comparison between the predictions of*  
1073 *diffusion-reaction models and localized Ca<sup>2+</sup> transients in amphibian skeletal*  
1074 *muscle fibers*. Biophys J, 2003. **85**(2): p. 1080-97.
- 1075 25. Pedersen, K.K., et al., *Moderately elevated extracellular*  
1076 *[K<sup>+</sup>] potentiates submaximal force and power in skeletal*  
1077 *muscle via increased [Ca<sup>2+</sup>]<sub>i</sub> during*  
1078 *contractions*. American Journal of Physiology - Cell Physiology, 2019. **317**(5): p.  
1079 C900-C909.
- 1080 26. Wang, X., et al., *The role of action potential changes in depolarization-induced*  
1081 *failure of excitation contraction coupling in mouse skeletal muscle*. eLife, 2022. **11**.
- 1082 27. Campbell, D.T. and B. Hille, *Kinetic and pharmacological properties of the sodium*  
1083 *channel of frog skeletal muscle*. Journal of General Physiology, 1976. **67**(3): p.  
1084 309-23.
- 1085 28. DiFranco, M. and J.L. Vergara, *The Na conductance in the sarcolemma and the*  
1086 *transverse tubular system membranes of mammalian skeletal muscle fibers*.  
1087 Journal of General Physiology, 2011. **138**(4): p. 393-419.
- 1088 29. Filatov, G.N., M.J. Pinter, and M.M. Rich, *Resting potential-dependent regulation*  
1089 *of the voltage sensitivity of sodium channel gating in rat skeletal muscle in vivo*.  
1090 Journal of General Physiology, 2005. **126**(2): p. 161-72.
- 1091 30. Miledi, R., et al., *Effects of membrane polarization on sarcoplasmic calcium*  
1092 *release in skeletal muscle*. Proceedings of the Royal Society of London. Series B,  
1093 Containing Papers of a Biological Character, 1981. **213**(1190): p. 1-13.
- 1094 31. Caputo, C., F. Bezanilla, and P. Horowicz, *Depolarization-contraction coupling in*  
1095 *short frog muscle fibers. A voltage clamp study*. J Gen Physiol, 1984. **84**(1): p. 133-  
1096 54.

- 1097 32. DiFranco, M., et al., *Inward rectifier potassium currents in mammalian skeletal*  
1098 *muscle fibres*. J Physiol, 2015. **593**(5): p. 1213-38.
- 1099 33. Standen, N.B. and P.R. Stanfield, *Inward rectification in skeletal muscle: a blocking*  
1100 *particle model*. Pflugers Archiv - European Journal of Physiology, 1978. **378**(2): p.  
1101 173-6.
- 1102 34. DiFranco, M., J. Lingrel, and J. Heiny, *Potassium regulation of the NAK-ATPase*  
1103 *pump current in mammalian skeletal muscle fibers*. Biophysical Journal, 2014. **108**:  
1104 p. 233a-234a.
- 1105 35. Radzyukevich, T.L., et al., *Tissue-specific role of the Na,K-ATPase alpha2*  
1106 *isozyme in skeletal muscle*. Journal of Biological Chemistry, 2013. **288**(2): p. 1226-  
1107 37.
- 1108 36. Overgaard, K., O.B. Nielsen, and T. Clausen, *Effects of reduced electrochemical*  
1109 *Na<sup>+</sup> gradient on contractility in skeletal muscle: role of the Na<sup>+</sup>-K<sup>+</sup> pump*. Pflugers  
1110 Arch, 1997. **434**(4): p. 457-65.
- 1111 37. Yensen, C., W. Matar, and J.M. Renaud, *K<sup>+</sup>-induced twitch potentiation is not due*  
1112 *to longer action potential*. Am J Physiol Cell Physiol, 2002. **283**(1): p. C169-77.
- 1113 38. Hidalgo, C., *Lipid phase of transverse tubule membranes from skeletal muscle. An*  
1114 *electron paramagnetic resonance study*. Biophysical Journal, 1985. **47**(6): p. 757-  
1115 64.
- 1116 39. Roseblatt, M., et al., *Immunological and biochemical properties of transverse*  
1117 *tubule membranes isolated from rabbit skeletal muscle*. Journal of Biological  
1118 Chemistry, 1981. **256**(15): p. 8140-8.
- 1119 40. Rosenhouse-Dantsker, A., D. Mehta, and I. Levitan, *Regulation of ion channels by*  
1120 *membrane lipids*. Comprehensive Physiology, 2012. **2**(1): p. 31-68.
- 1121 41. Lueck, J.D., et al., *Sarcolemmal-restricted localization of functional CIC-1 channels*  
1122 *in mouse skeletal muscle*. Journal of General Physiology, 2010. **136**(6): p. 597-  
1123 613.
- 1124 42. DiFranco, M., A. Herrera, and J.L. Vergara, *Chloride currents from the transverse*  
1125 *tubular system in adult mammalian skeletal muscle fibers*. J Gen Physiol, 2011.  
1126 **137**(1): p. 21-41.
- 1127 43. Fahlke, C., *Chloride channels take center stage in a muscular drama*. Journal of  
1128 General Physiology, 2011. **137**(1): p. 17-19.
- 1129 44. Heiny, J., et al., *Isoform-specific roles of the Na,K-ATPase alpha subunits in*  
1130 *skeletal muscle*. Third Symposium ATP1A3 in disease: Genotype/phenotype  
1131 correlations, modelling and identification of potential targets for treatment., 2014.
- 1132 45. Pedersen, T.H., L.H.H. C, and J.A. Fraser, *An analysis of the relationships*  
1133 *between subthreshold electrical properties and excitability in skeletal muscle*. J  
1134 Gen Physiol, 2011. **138**(1): p. 73-93.
- 1135 46. DiFranco, M., et al., *Action potential-evoked calcium release is impaired in single*  
1136 *skeletal muscle fibers from heart failure patients*. PLoS One, 2014. **9**(10): p.  
1137 e109309.  
1138

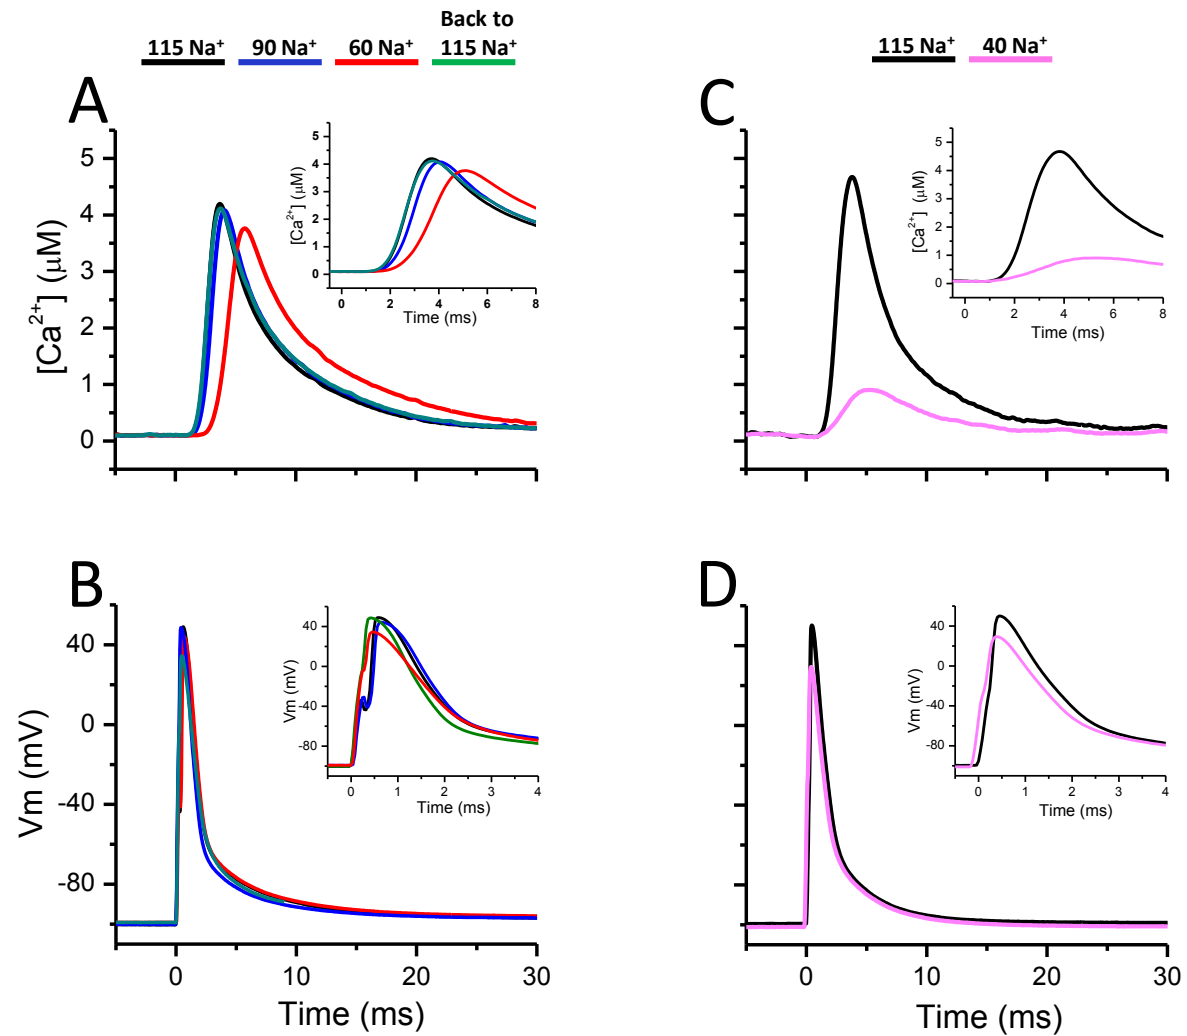

115 Na<sup>+</sup>90 Na<sup>+</sup>60 Na<sup>+</sup>40 Na<sup>+</sup>

-100 -80 -60 -55

-100 -80 -60 -57

-100 -80 -70 -65

-100 -90 -80 -70

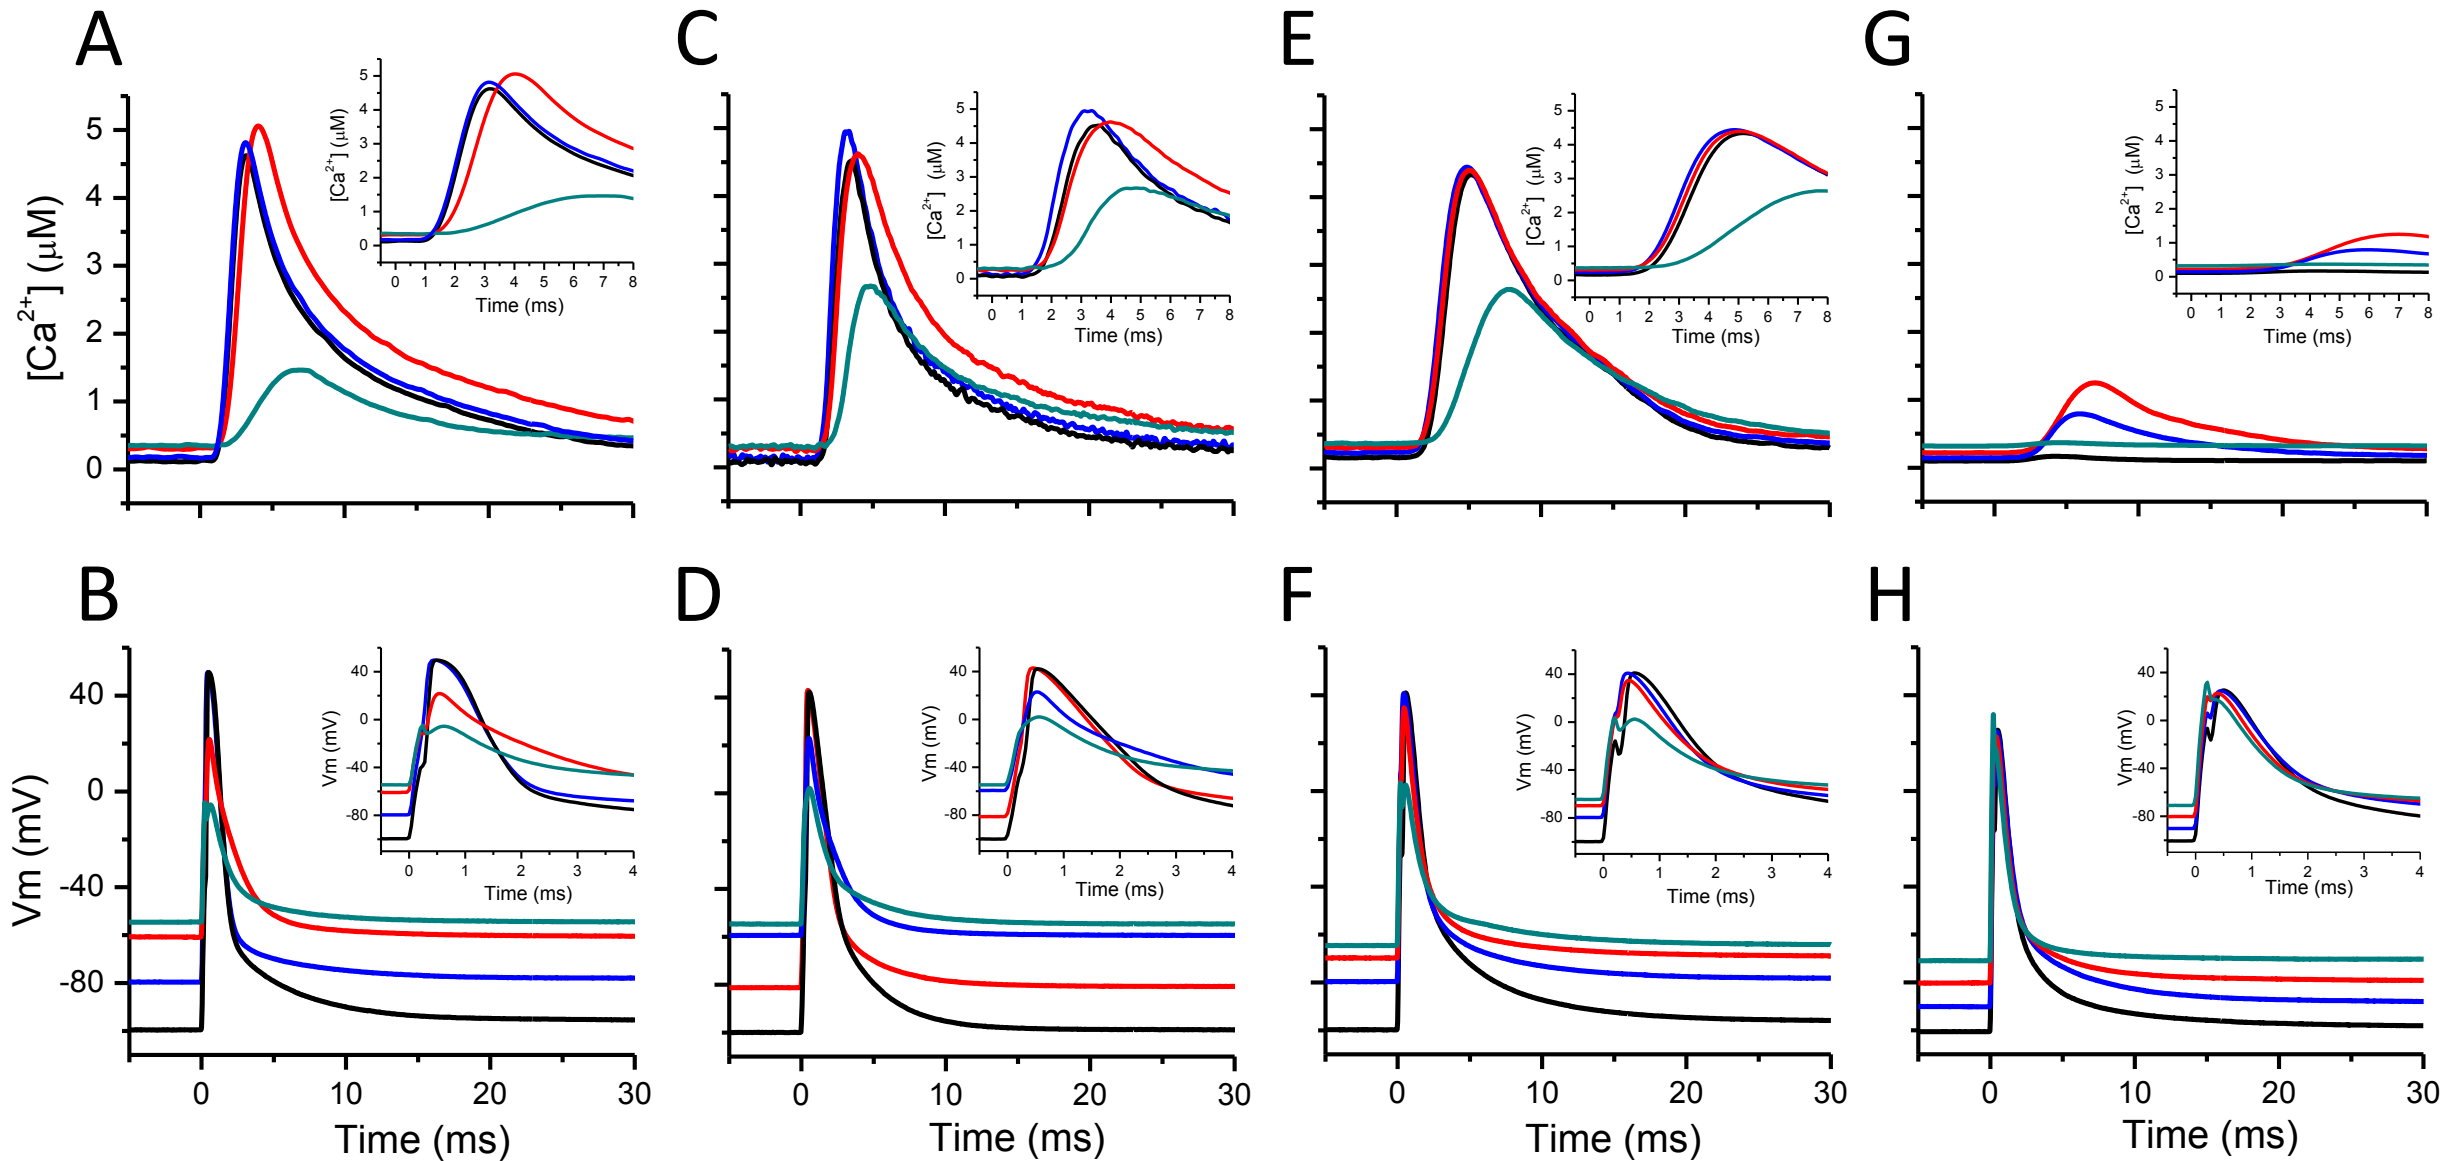

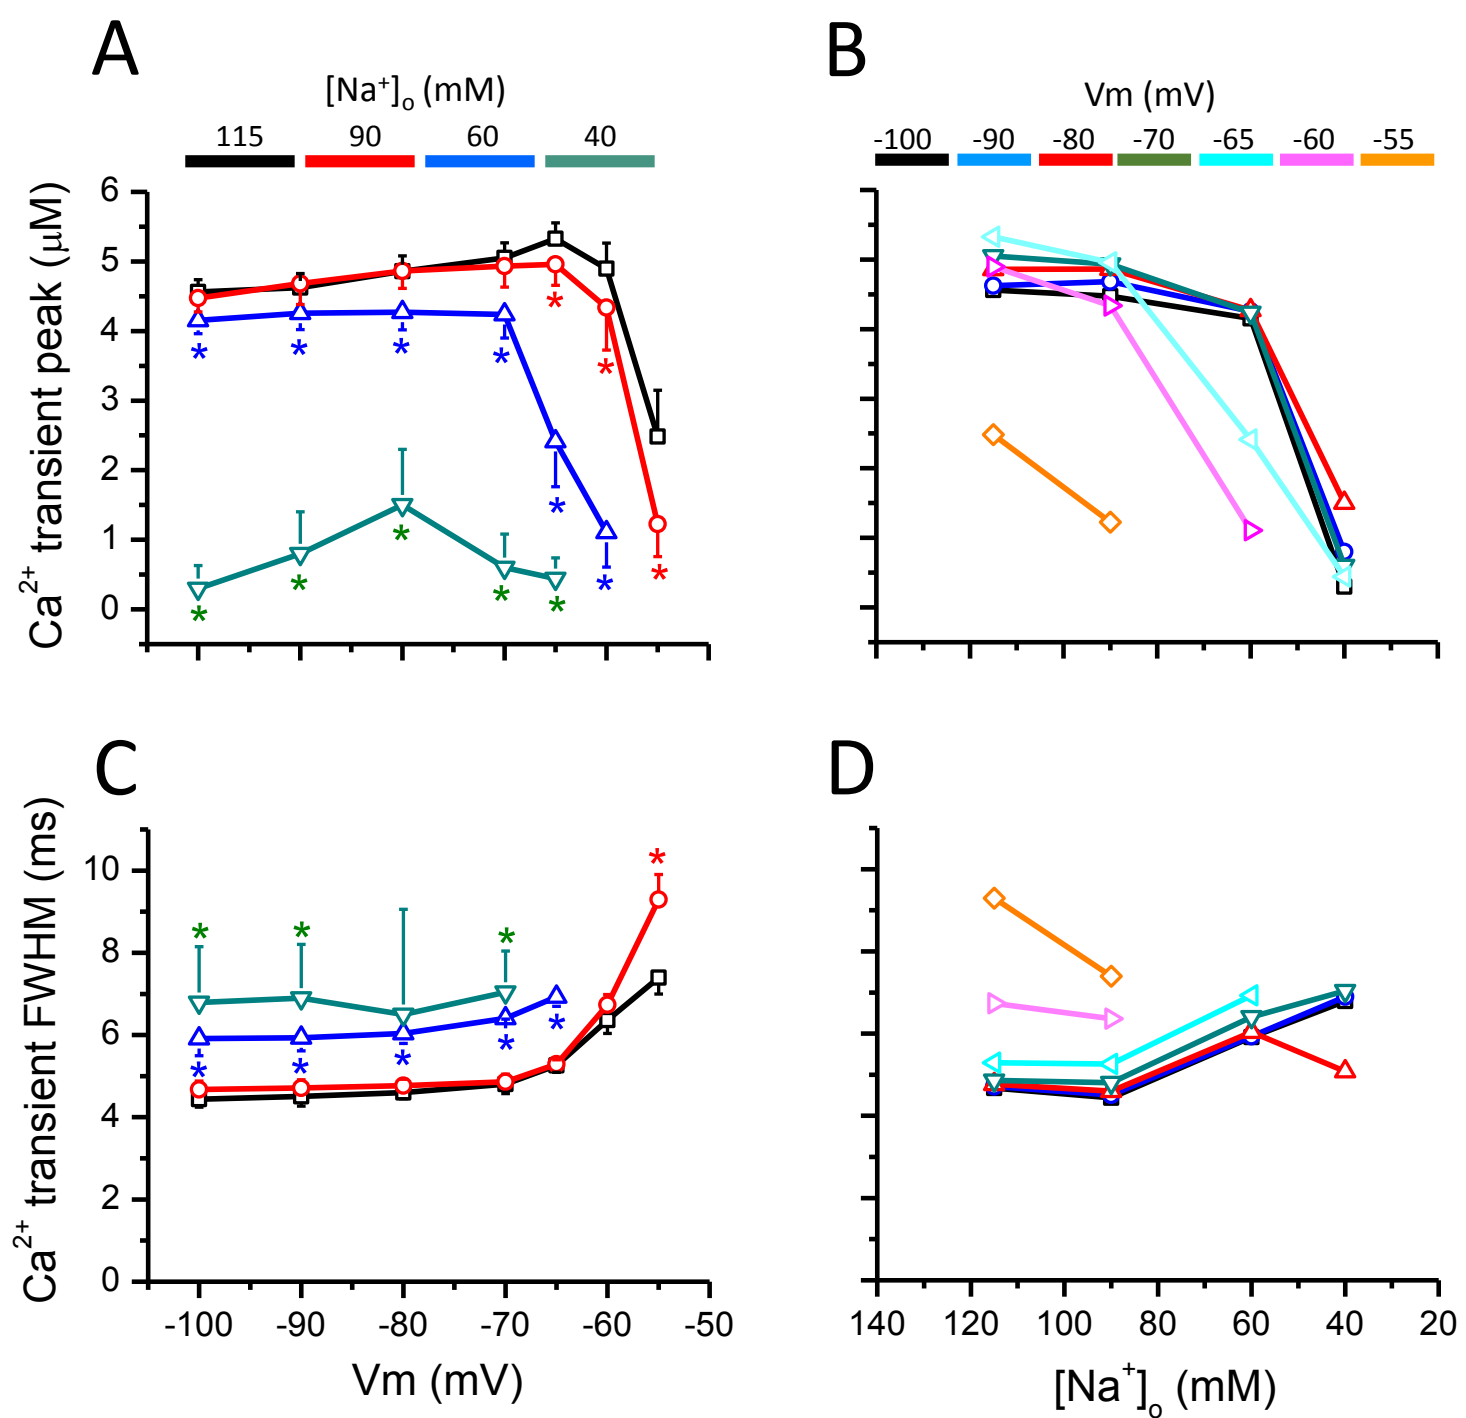



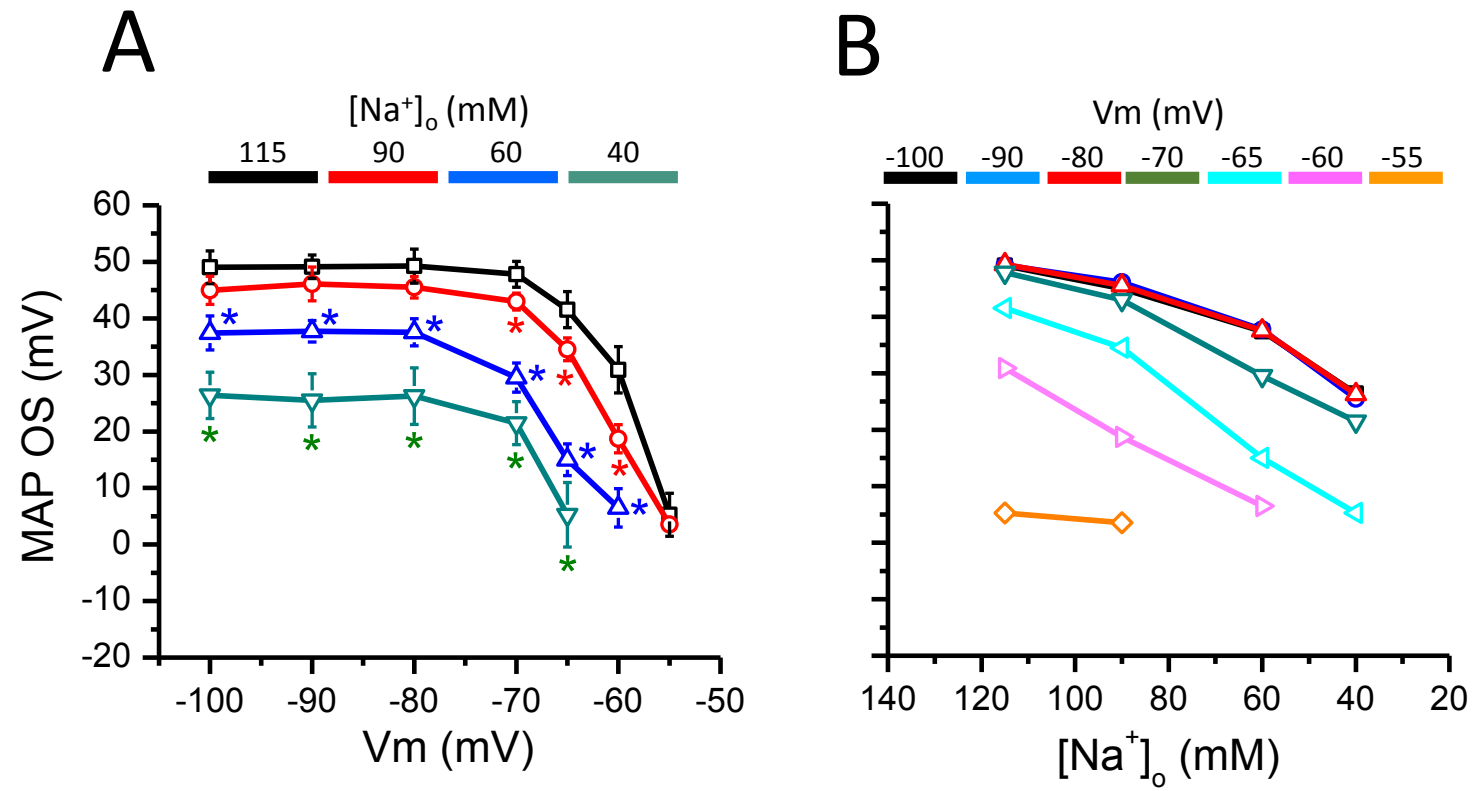

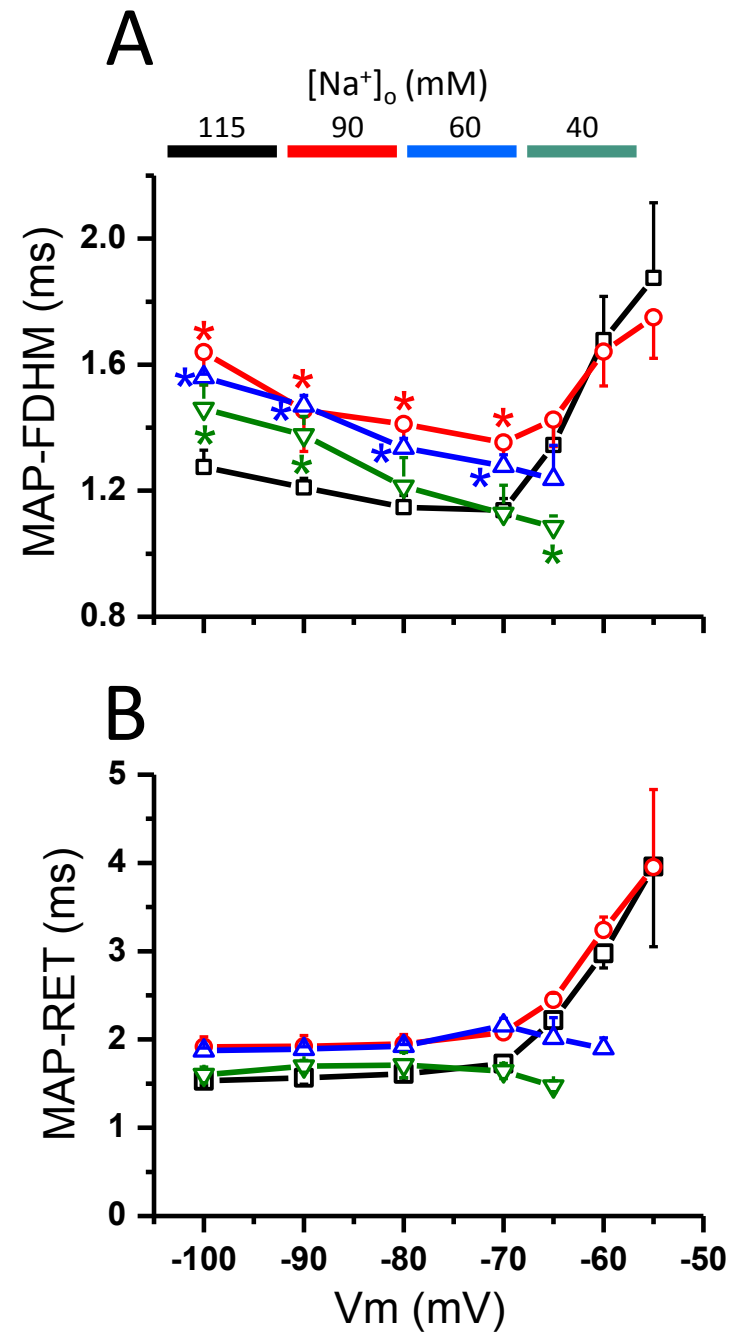

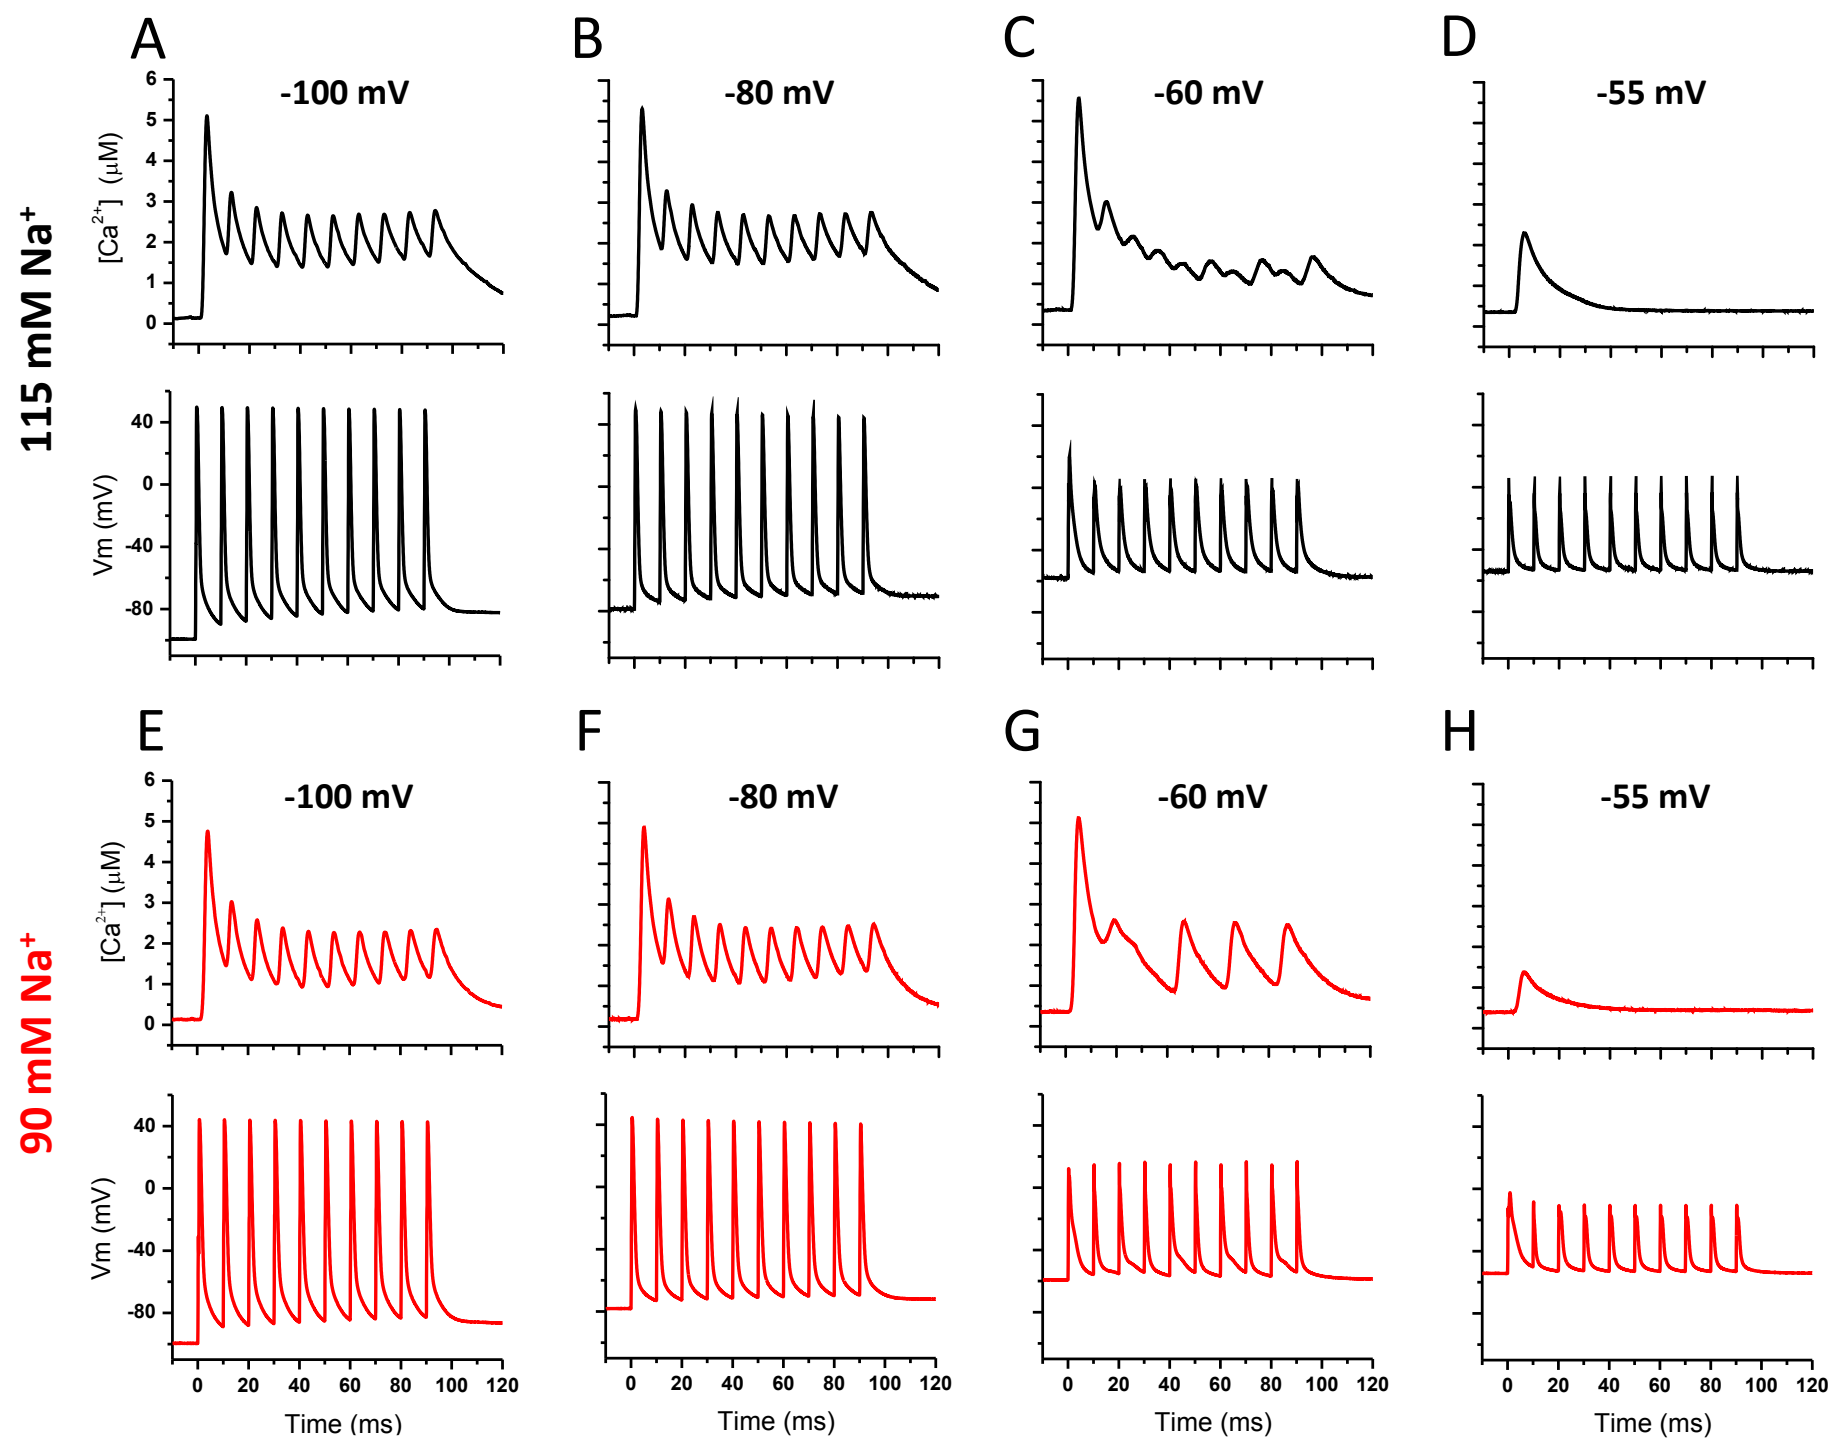

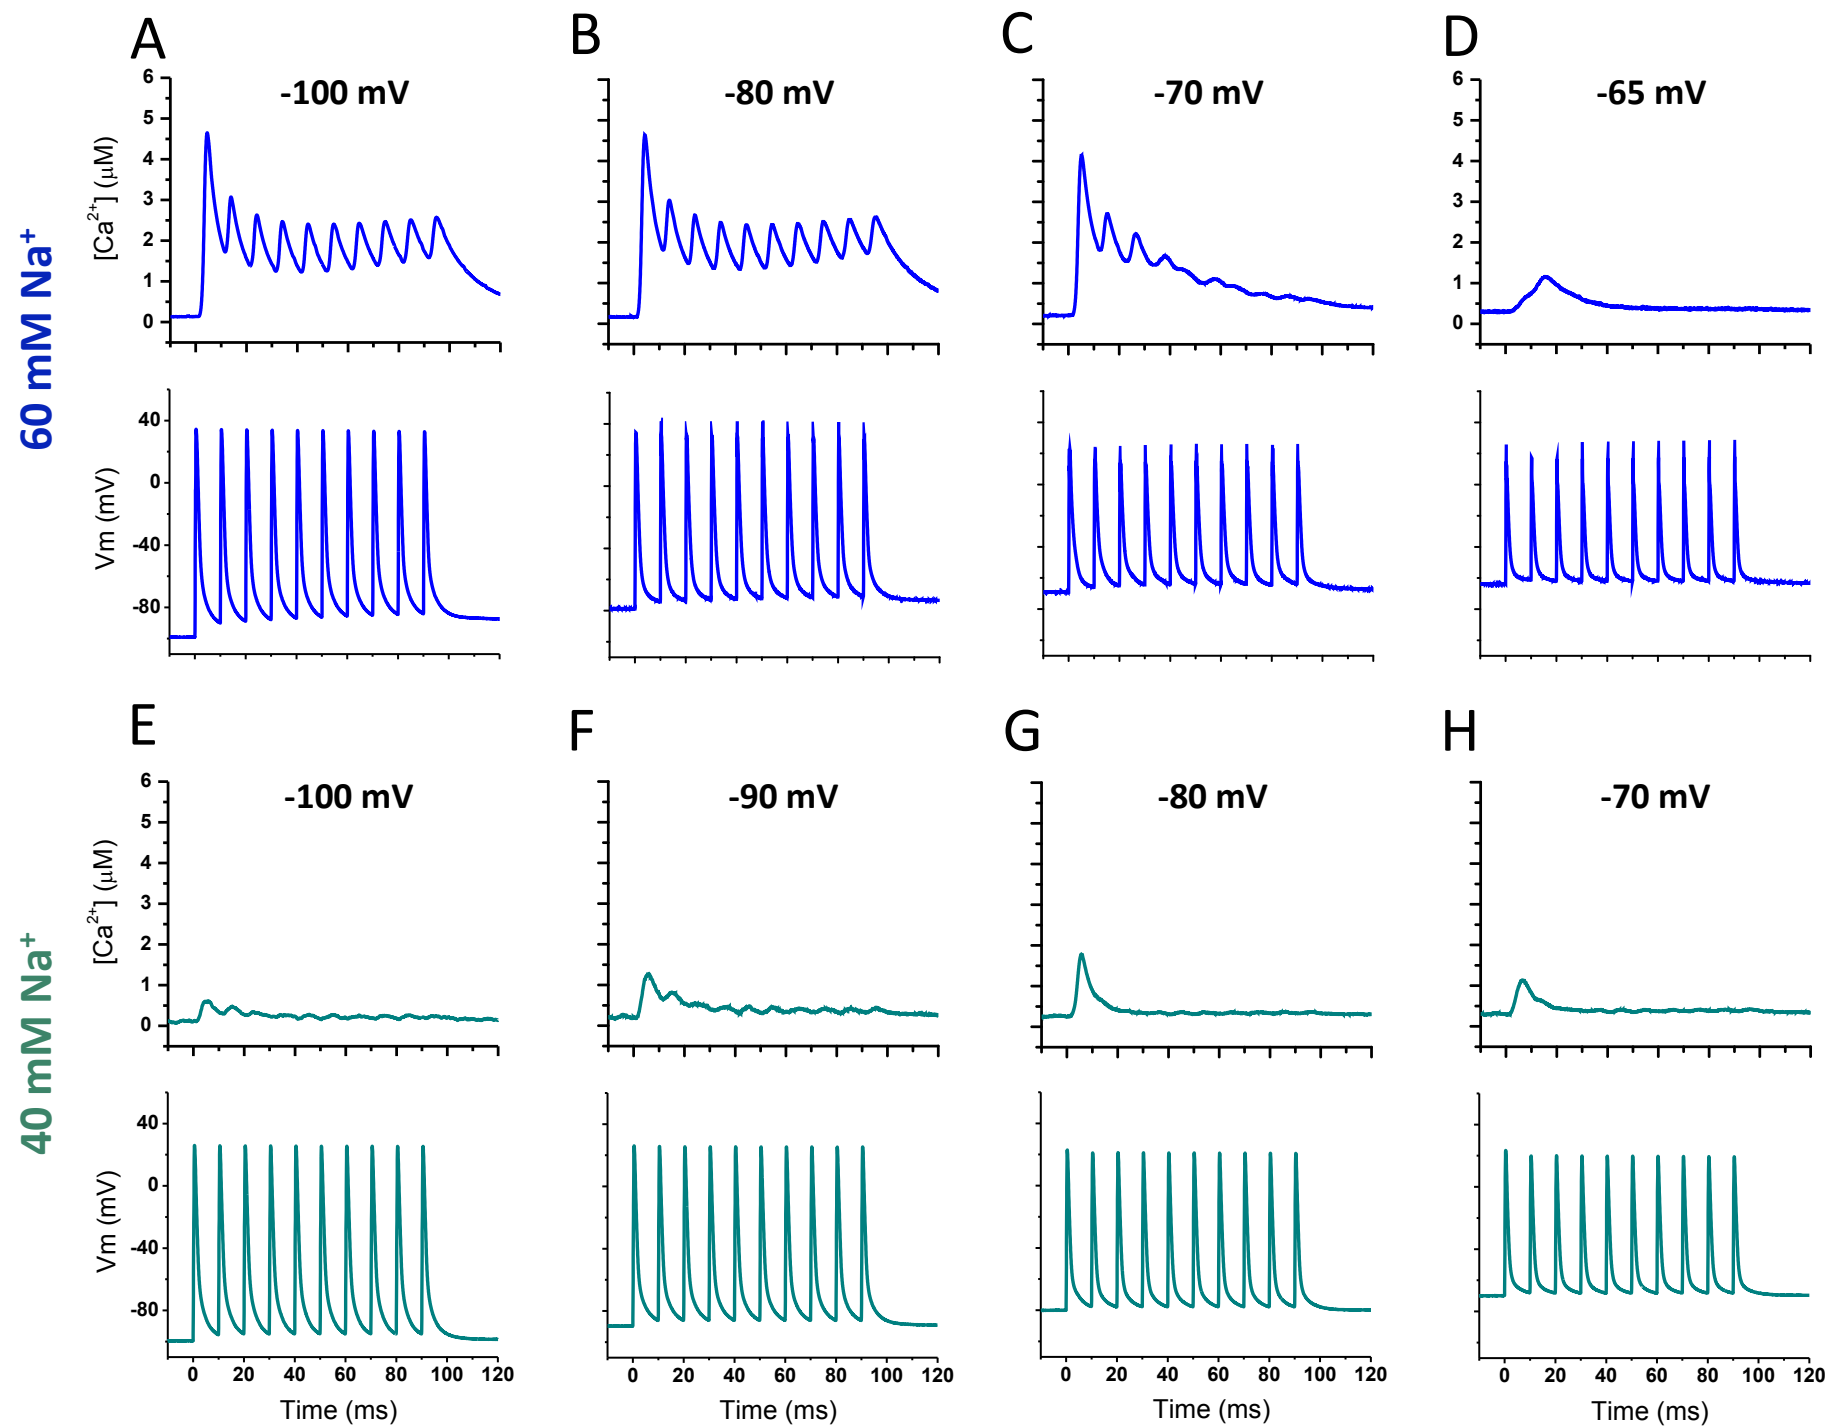

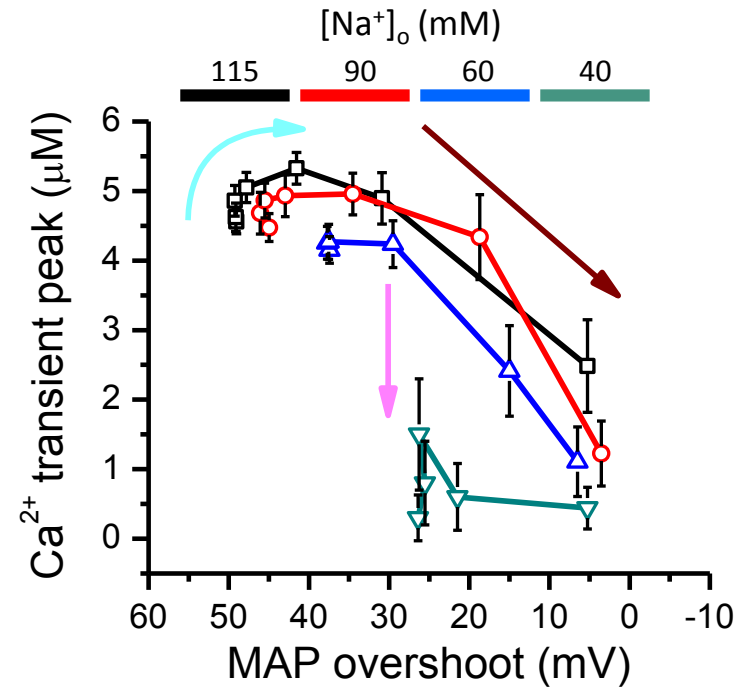



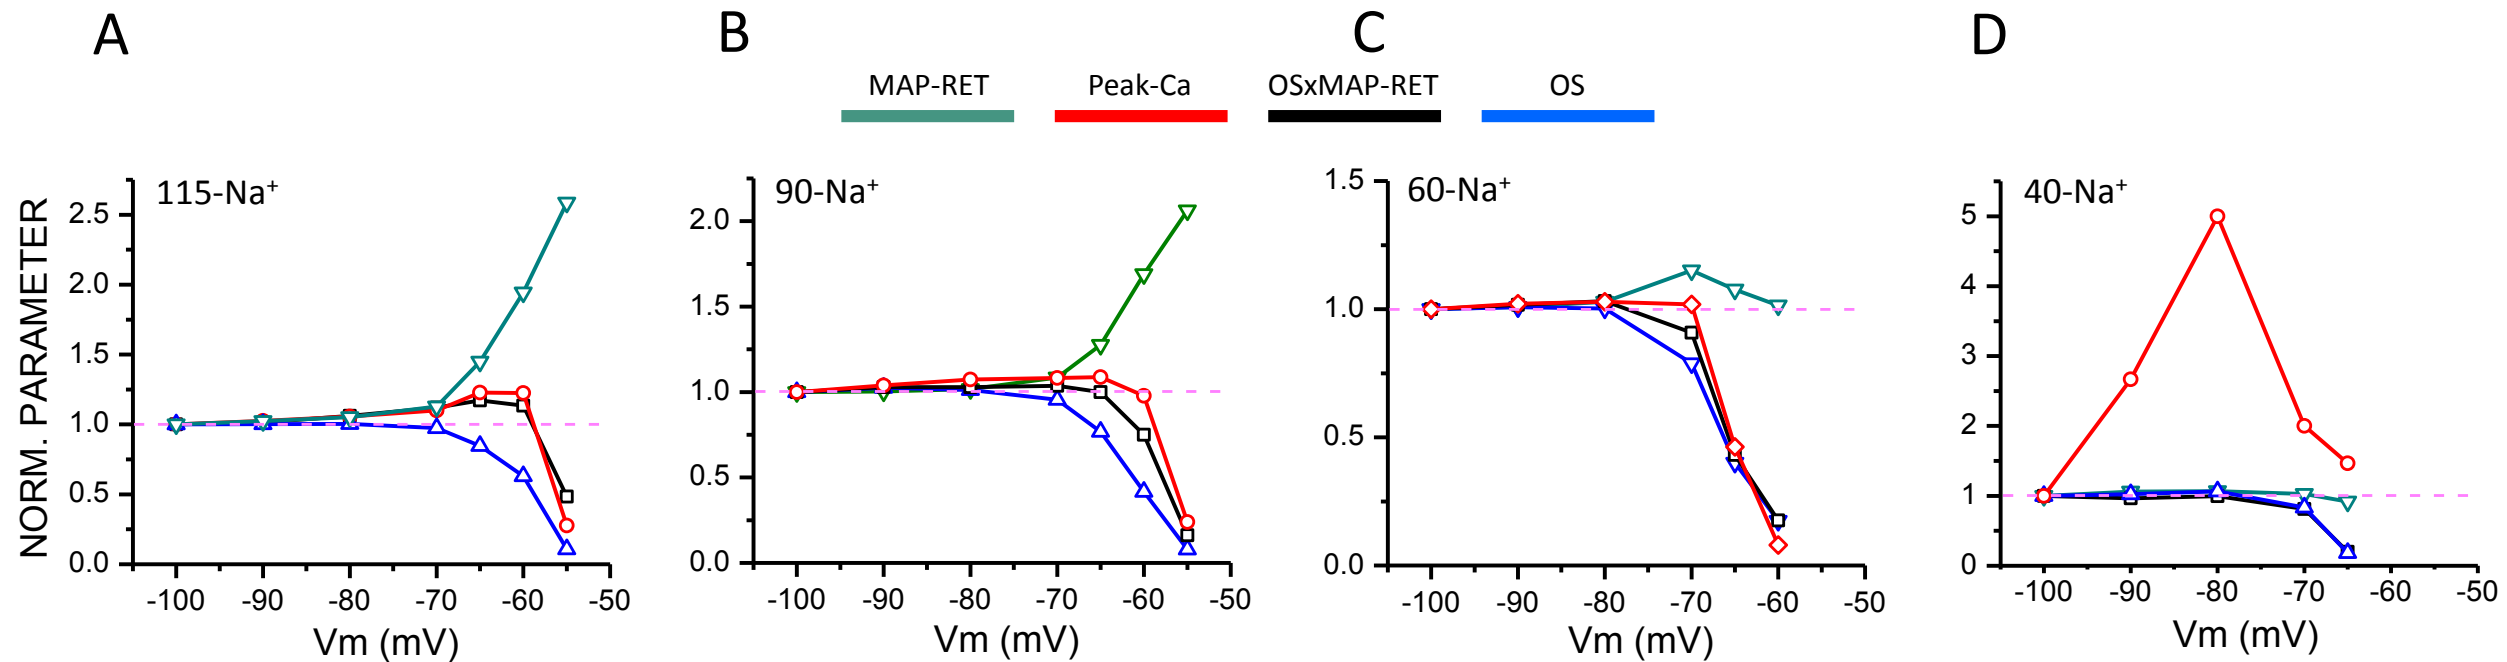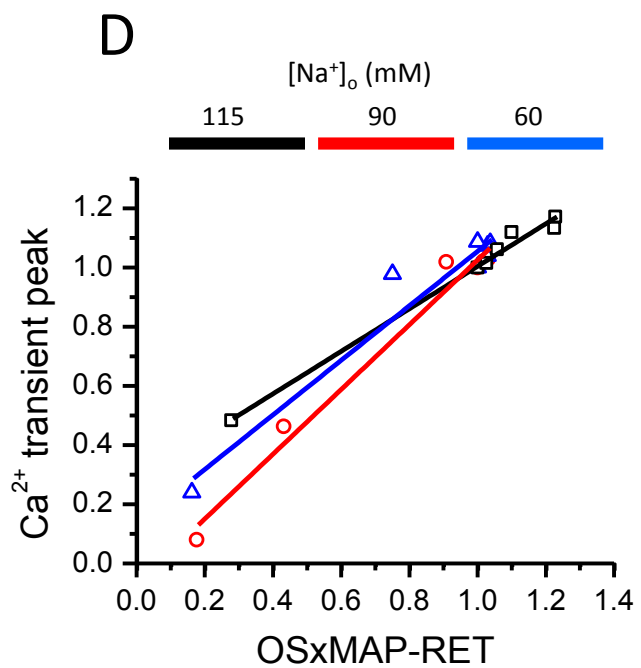

Source: https://www.biorxiv.org/content/10.1101/2022.04.28.489961v1.full.pdf
